# Rats strategically manage learning during perceptual decision making

Javier Masís,<sup>1,2\*†</sup> Travis Chapman,<sup>2</sup> Juliana Y. Rhee,<sup>1,2</sup> David D. Cox,<sup>1,2‡</sup> Andrew M. Saxe<sup>3\*</sup>

<sup>1</sup>Department of Molecular and Cellular Biology, Harvard University, Cambridge 02138, MA, U.S.A.

<sup>2</sup>Center for Brain Science, Harvard University, Cambridge, MA 02138, U.S.A.

<sup>3</sup>Department of Experimental Psychology, University of Oxford, Oxford OX2 6GG, U.K.

<sup>†</sup> Present address: Princeton Neuroscience Institute, Princeton University, Princeton, NJ 08544, U.S.A.

<sup>‡</sup> Present address: MIT-IBM Watson AI Lab, Cambridge, MA 02142, U.S.A.

\* Correspondence: [jmasis@princeton.edu](mailto:jmasis@princeton.edu), [andrew.saxe@psy.ox.ac.uk](mailto:andrew.saxe@psy.ox.ac.uk).

## Abstract

Balancing the speed and accuracy of decisions is crucial for survival, but how organisms manage this trade-off during learning is largely unknown. Here, we track this trade-off during perceptual learning in rats and simulated agents. At the start of learning, rats chose long reaction times that did not optimize instantaneous reward rate, but by the end of learning chose near-optimal reaction times. To understand this behavior, we analyzed learning dynamics in a recurrent neural network model of the task. The model reveals a fundamental trade-off between instantaneous reward rate and perceptual learning speed, putting the goals of learning quickly and accruing immediate reward in tension. We find that the rats' strategy of long initial responses can dramatically expedite learning, yielding higher total reward over task engagement. Our results demonstrate that prioritizing learning can be advantageous from a total reward perspective, and suggest that rats engage in cognitive control of learning.

## Introduction

The speed-accuracy trade-off in decision making has been the subject of intense research, dating back nearly one-hundred years [1–14]. When facing noisy perceptual inputs, the longer an agent takes in making a choice the more likely that choice will be advantageous, but the less time is left to tackle subsequent choices. Choosing the right amount of time to deliberate on a particular decision is crucial for maximizing reward rate [9, 10].

Studies of the speed-accuracy trade-off have focused on how the brain may solve it [9, 15], what the optimal solution is [10], and whether agents can indeed manage it [11, 14, 16–22]. Though most work in this area has taken place in humans and non-human primates, several studies have established the presence of a speed-accuracy trade-off in rodents [23–28]. The broad conclusion of much of this literature is that after extensive training, many subjects come close to optimal performance [11, 17–21, 29–31]. When faced with deviations from optimality, several hypotheses have been proposed, including error avoidance, poor internal estimates of time, and a minimization of the cognitive cost associated with an optimal strategy [10, 30–32].

Past studies have shown how agents behave after reaching steady state performance [11, 17–21, 29, 30], but relatively less attention has been paid to how agents learn to approach near-optimal behavior (*but see* [18, 33]). While maximizing instantaneous reward rate is a sensible goal when the task is fully mastered, it is less clear that this objective is appropriate during learning.

Here, we set out to understand how agents manage the speed-accuracy trade-off during learning by studying the learning trajectory of rats in a free response two-alternative forced-choice visual object recognition task [34]. Rats near-optimally maximized instantaneous reward rate (iRR) at the end of learning but chose response times that were too slow to be iRR-optimal early in learning. To understand the rats' learning trajectory, we examined learning trajectories in a recurrent neural network (RNN) trained on the same task. We derive a reduction of this RNN to a learning drift diffusion model (LDDM)

with time-varying parameters that describes the network’s average learning dynamics. Mathematical analysis of this model reveals a dilemma: at the beginning of learning when error rates are high, iRR is maximized by fast responses [10]. However, fast responses mean minimal stimulus exposure, little opportunity for perceptual processing, and consequently slow learning. Because of this learning speed/iRR (LS/iRR) trade-off, slow responses early in learning can yield greater total reward over engagement with the task, suggesting a normative basis for the rats’ behavior. We then experimentally tested and confirmed several model predictions by evaluating whether response time and learning speed are causally related, and whether rats choose their response times so as to take advantage of learning opportunities. Our results suggest that rats exhibit cognitive control of the learning process, adapting their behavior to approximately accrue maximal total reward across the entire learning trajectory, and indicate that a policy that prioritizes learning in perceptual tasks may be advantageous from a total reward perspective.

## Results

### Trained Rats Solve the Speed-Accuracy trade-off

We trained  $n = 26$  rats on a visual object recognition two-alternative forced choice task (*see METHODS*) [34]. The rats began a trial by licking the central of three capacitive lick ports, at which time a static visual object that varied in size and rotation from one of two categories appeared on a screen. After evaluating the stimulus, the rats licked the right or left lick port. When correct, they received a water reward, and when incorrect, a timeout period (Fig. 1a, Fig. S1). Because this was a free-response task, rats were also able to initiate a trial and not make a response, but these ignored trials made up a small fraction of all trials and were not considered during our analysis (Fig. S2).

We examined the relationship between error rate (ER) and decision time (DT) during asymptotic performance using the drift-diffusion model (DDM) (Fig. S3). In the DDM, perceptual information is integrated through time until the level of evidence for one alternative reaches a threshold. The speed-accuracy trade-off is controlled by the subject’s choice of threshold, and is solved when a subject’s performance lies on an optimal performance curve (OPC; Fig. 1b) [10]. The OPC defines the mean normalized DT and ER combination for which an agent will collect maximal iRR (*see METHODS*). At any given time, an agent will have some perceptual sensitivity (signal-to-noise ratio, SNR) which reflects how much information about the stimulus arrives per unit time. Given this SNR, an agent’s position in speed-accuracy space (the space relating ER and DT) is constrained to lie on a performance frontier traced out by different thresholds (Fig. 1b). Using a low threshold yields fast but error-prone responses, while using a high threshold yields slow but accurate responses. An agent only maximizes iRR when it chooses the ER and DT combination on its performance frontier that intersects the OPC. After learning the task to criterion, over half the subjects collected over 99% of their total possible reward, based on inferred SNRs assuming a DDM (Fig. 1c, d).

Across a population, a uniform stimulus difficulty will reveal different SNRs because the internal perceptual processing ability in every subject will be different. Thus, although we did not explicitly vary stimulus difficulty [11, 18, 29, 30], as a population, animals clustered along the OPC across a range of ERs (Fig. 1d), supporting the assertion that well-trained rats achieve a near maximal iRR in this perceptual task. We note that subjects did not span the entire range of possible ERs, and that the differences in optimal DTs dictated by the OPC for the ERs we did observe are not large. It remains unclear whether our subjects would be optimal over a wider range of task parameters. Notwithstanding, previous work with a similar task found that rats did increase DTs in response to increased penalty times, indicating a sensitivity to these parameters [26]. Thus, for our perceptual task and its parameters, trained rats approximately solve the speed-accuracy trade-off.

### Rats Do Not Maximize Instantaneous Reward Rate During Learning

Knowing that rats harvested reward near-optimally after learning, we next asked whether rats harvested instantaneous reward near-optimally during learning as well. If rats optimized iRR throughout learning, their trajectories in speed-accuracy space should always track the OPC.

During learning, a representative individual ( $n = 1$ ) started with long RTs that decreased as accuracy increased across training time (Fig. 2a). Transforming this trajectory to speed-accuracy space revealed that throughout learning the individual did not follow the OPC (Fig. 2b). Early in learning, the individual started with a much higher DT than optimal, but as learning progressed it approached the OPC. The maximum iRR opportunity cost is the fraction of maximum possible iRR relinquished for

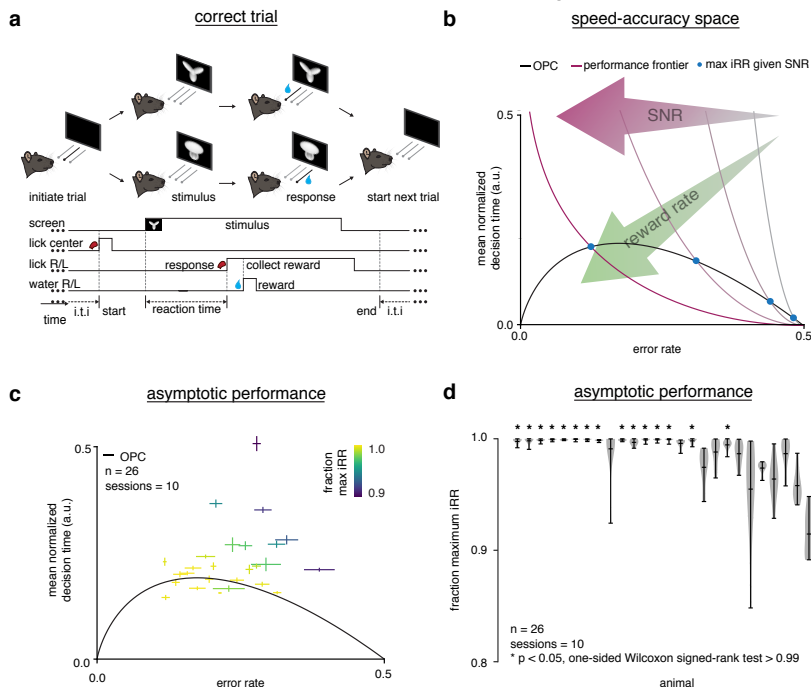

Figure 1: **Trained rats solve the speed-accuracy trade-off.** (a) Rat initiates trial by licking center port, one of two visual stimuli appears on the screen, rat chooses correct left/right response port for that stimulus and receives a water reward. (b) Speed-accuracy space: a decision making agent’s ER and mean normalized DT (a normalization of DT based on the average timing between one trial and the next, *see METHODS*). Assuming a simple drift-diffusion process, agents that maximize iRR (*see METHODS: EVALUATION OF OPTIMALITY*) must lie on an optimal performance curve (OPC, black trace) [10]. Points on the OPC relate error rate to mean normalized decision time, where the normalization takes account of task timing parameters (*e.g.* average response-to-stimulus interval). For a given SNR, an agent’s performance must lie on a performance frontier swept out by the set of possible threshold-to-drift ratios and their corresponding error rates and mean normalized decision times. The intersection point between the performance frontier and the OPC is the error rate and mean normalized decision time combination that maximizes iRR for that SNR. Any other point along the performance frontier, whether above or below the OPC, will achieve a suboptimal iRR. Overall, iRR increases toward the bottom left with maximal instantaneous reward rate at error rate = 0.0 and mean normalized decision time = 0.0. (c) Mean performance across 10 sessions for trained rats ( $n = 26$ ) at asymptotic performance plotted in speed-accuracy space. Each cross is a different rat. Color indicates fraction of maximum instantaneous reward rate (iRR) as determined by each rat’s performance frontier. Errors are bootstrapped SEMs. (d) Fraction of maximum iRR, a quantification of distance to the OPC, for same rats and same sessions as c. Fraction of maximum iRR is a comparison of an agent’s current iRR with its optimal iRR given its inferred SNR. Approximately 15 of 26 (~60%) of rats attain greater than 99% fraction maximum iRRs for their individual inferred SNRs. \* denotes  $p < 0.05$ , one-tailed Wilcoxon signed-rank test for mean  $> 0.99$ .

92 a choice of threshold (and average DT) (*see METHODS*). We found that this individual gave up over  
 93 20% of possible iRR at the beginning of learning but harvested reward near-optimally at asymptotic  
 94 performance (Fig. 2c). These trends held when the learning trajectories of  $n = 26$  individuals were  
 95 averaged (Fig. 2d-f). These results show that rats do not greedily maximize iRR throughout learning  
 96 and lead to the question: if rats maximize iRR at the end of learning, what principle governs their  
 97 strategy at the beginning of learning?

## 98 Model Reveals That Prioritizing Learning Can Maximize Total Reward

99 To simulate various learning strategies, we developed a simple linear recurrent neural network formalism  
 100 for our task with the goal of investigating how long-term perceptual learning across many trials is  
 101 influenced by the choice of DT (Box 1). A simple linear neural network processes input stimuli through  
 102 weighted synaptic connections  $w$ . To model eye and body motion, the inputs are slightly jittered and  
 103 rotated on each time step of a trial. For simplicity, the recurrent connectivity is fixed to 1 such that  
 104 inputs are linearly integrated through time [35]. When the recurrent activity hits a threshold level, a

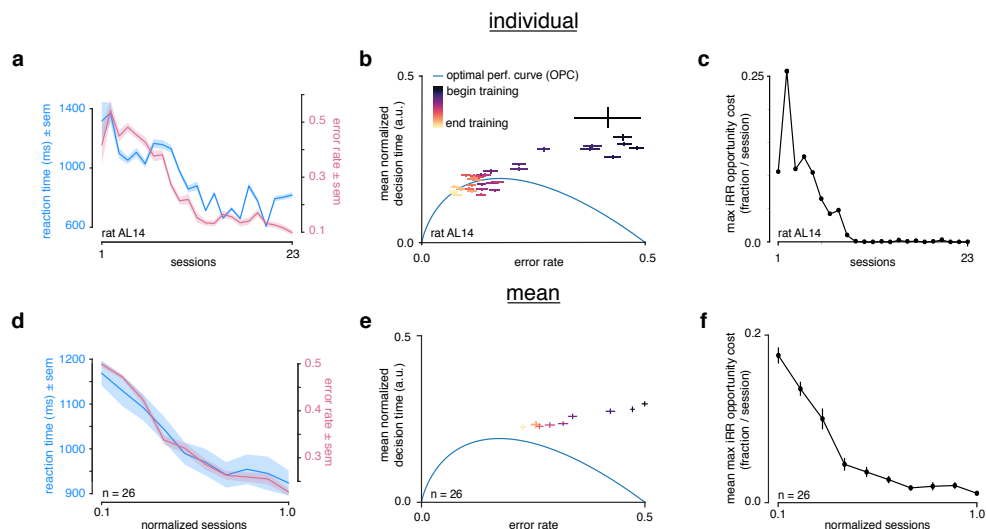

Figure 2: **Rats do not greedily maximize instantaneous reward rate during learning.** (a) Reaction time (blue) and error rate (pink) for an example subject (rat AL14) across 23 sessions. (b) Learning trajectory of individual subject (rat AL14) in speed-accuracy space. Color map indicates training time. OPC in blue. (c) Maximum iRR opportunity cost (see METHODS) for individual subject (rat AL14) and error rate (pink) for  $n = 26$  rats during learning. Sessions across subjects were transformed into normalized sessions, averaged and binned to show learning across 10 bins. Normalized training time allows averaging across subjects with different learning rates (see METHODS). (e) Learning trajectory of  $n = 26$  rats in speed-accuracy space. Color map and OPC as in a. (f) Maximum iRR opportunity cost of rats in b throughout learning. Errors reflect within-subject session SEMs for a and b and across-subject session SEMs for d, e and f.

105 response is made and the trial terminates. Then, to model perceptual learning, the perceptual weights  
 106  $w$  are updated using error-corrective learning, implemented as gradient descent on the hinge loss (see  
 107 METHODS).

108 While this model can be simulated to obtain sample learning trajectories, its average dynamics can  
 109 also be solved analytically, yielding important insights. We derived a reduction of this model to a DDM  
 110 with time-dependent parameters. This “learning DDM” (LDDM) closely tracked simulated trajectories  
 111 of the full network (Box 1; Fig. S4; see METHODS). In short, the reduction explains how SNR in a  
 112 DDM model changes over time on average under error-corrective learning. In designing this model, we  
 113 kept components as simple as possible to highlight key qualitative trade-offs between learning speed and  
 114 decision strategy. Because of its simplicity, like the standard DDM, it is not meant to quantitatively  
 115 describe all aspects of behavior. We instead use it to investigate qualitative features of decision making  
 116 strategy, and expect that these features would be preserved in other related models of perceptual decision  
 117 making [9, 36–48].

118 A key prediction of the LDDM is a tension between learning speed and iRR, the LS/iRR trade-off.  
 119 This tension is clearest early in learning when ERs are near 50%. Then the rate of change in SNR is

$$\frac{d}{dt}\text{SNR} \propto \frac{DT}{D_{tot}} \quad (1)$$

120 where the proportionality constant does not depend on  $DT$  (see derivation, METHODS). Hence learning  
 121 speed increases with increasing  $DT$ . By contrast the iRR when accuracy is 50% decreases with increasing  
 122  $DT$ . When encountering a new task, therefore, agents face a dilemma: they can either harvest a large  
 123 iRR, or they can learn quickly.

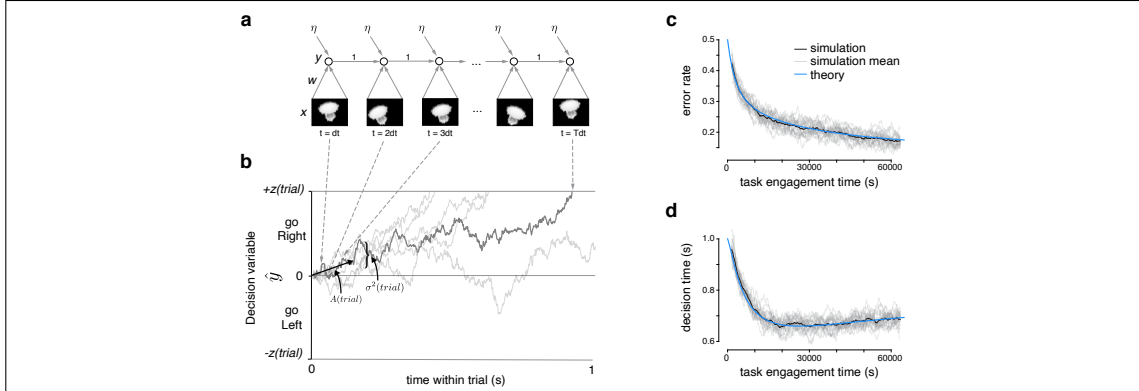

### Box 1: Recurrent Neural Network and Learning DDM models

Within a trial, inputs  $x(t)$  are filtered through perceptual weights  $w(\text{trial})$  at discrete times  $t = 1dt, 2dt, \dots$  where  $dt$  is a small time step parameter, and added to a decision variable  $\hat{y}(t)$  along with i.i.d. integrator noise  $\eta(t) \sim \mathcal{N}(0, c_o^2)$ . When the decision variable crosses a threshold  $\pm z(\text{trial})$ , a decision is made. Panel A shows one example roll out of the recurrent neural network (RNN) through time.

These within-trial dynamics in the limit of small time steps are equivalent to a standard drift-diffusion model (DDM) with a drift rate  $A(\text{trial})$  toward the correct response and diffusion noise variance  $\sigma^2(\text{trial})$  that depend on the distribution of inputs  $x(t)$  and weights  $w(\text{trial})$  (see derivation, METHODS). Average performance is governed by the signal-to-noise ratio  $\bar{A}(\text{trial}) = A(\text{trial})^2/\sigma^2(\text{trial})$  and threshold  $z(\text{trial})$ . Panel B shows the decision variable for the RNN (dark gray), and other trajectories of the equivalent DDM for different diffusion noise samples (light gray).

To implement perceptual learning, after each trial, weights in the recurrent network are updated using gradient descent on the hinge loss, corresponding to standard practice in deep learning:

$$w(\text{trial} + 1) = w(\text{trial}) - \lambda \frac{\partial \text{Loss}(\text{trial})}{\partial w}. \quad (2)$$

Here  $\lambda$  is a small learning rate and  $\text{Loss}(\text{trial}) = \max(0, 1 - y(\text{trial})\hat{y}(\text{trial}))$  where  $y(\text{trial}) = \pm 1$  is the correct output sign for the trial.

In the limit of small learning rates, applying Eq. (2) in the RNN is equivalent to the following SNR dynamics in the drift-diffusion model (see derivation, METHODS):

$$\tilde{\tau} \frac{d}{dt} \bar{A}(t) = 2 \sqrt{\frac{\bar{A}(t)(\bar{A}^*)}{c}} \left(1 - \frac{\bar{A}(t)}{\bar{A}^*}\right)^{5/2} \frac{ER}{D_{tot}} \left[ DT - \frac{\log(1/ER - 1)}{\bar{A}^* \left(1 - \frac{\bar{A}(t)}{\bar{A}^*}\right)^2} \right]. \quad (3)$$

Time  $t$  measures seconds of task engagement. The SNR dynamics depend on five parameters: the time constant  $\tilde{\tau}$  related to the learning rate, the initial SNR  $\bar{A}(0)$ , the asymptotic achievable SNR after learning  $\bar{A}^*$ , the integration-noise to input-noise variance ratio  $c$ , and the choice of threshold  $z(t)$  over training. Panels C-D show how  $ER$  and  $DT$  change over a long period of task engagement in the RNN (light gray, simulated individual traces; dark gray, mean) compared to the theoretical predictions from the learning DDM (blue).

An agent's decision making strategy consists of their choice of threshold over time  $z(t)$ . Threshold affects  $DT$  and  $ER$ , and through these, the learning dynamics in Eq. (3). We consider four threshold policies:

**iRR-Greedy** Threshold  $z^g(t)$  is set to the threshold  $z^*(\bar{A}(t))$  that maximizes instantaneous reward rate for current SNR,  $z^g(t) = z^*(\bar{A}(t))$ .

**iRR-Sensitive** Threshold  $z^s(t)$  decays with time constant  $\gamma$  from an initial value  $z^s(0) = z_0$  toward the iRR-optimal threshold,  $\gamma \frac{d}{dt} z^s(t) = z^*(\bar{A}(t)) - z^s(t)$ .

**Constant** Threshold  $z^c(t)$  is fixed to a constant  $z^c(t) = z_0$ .

**Global Optimal** Threshold  $z^o(t)$  maximizes total reward over the duration of task engagement  $T_{tot}$ ,

$$z^o(t) = \underset{z(t)}{\operatorname{argmax}} \int_0^{T_{tot}} RR(t) dt.$$

We approximately compute this threshold function using automatic differentiation (see METHODS).

125  
126  
127  
128  
129  
130  
131  
132  
133  
134  
135  
136  
137  
138  
139  
140  
141  
142  
143

Just as the standard DDM instantiates different decision making strategies as different choices of threshold (for instance aimed at maximizing iRR, accuracy, or robustness) [30, 31], the LDDM instantiates different learning strategies through the choice of threshold trajectory over learning. In order to understand the rats' learning trajectory, we evaluated several potential threshold policies (see Box 1 and METHODS: THRESHOLD POLICIES). An *iRR-greedy* threshold policy adjusts the threshold to maximize iRR at all times. This model is similar to a previously proposed neural network model of rapid threshold adjustment based on reward rate [16], and is iRR-optimal. A *constant* threshold policy is one where a target threshold that is optimal for some predicted future SNR is picked at the outset and kept constant throughout learning. Constant thresholds across difficulties have been found to be used as part of near-optimal and presumably cognitively cheaper strategies in humans [18]. In the *iRR-sensitive* threshold policy, the threshold starts at a specified initial value and then exponentially decays towards the threshold that would maximize iRR given the current SNR. Notably, with this policy, as the SNR changes due to learning, the target threshold also changes through time. Finally, in the *global optimal* threshold policy, the threshold trajectory throughout learning is optimized to maximize total cumulative reward at some known predetermined end to the task. We computed this globally optimal trajectory using automatic differentiation through a discretization of the reduction dynamics (see METHODS). Because it relies on knowledge unavailable to the agent at the start of learning (such as the asymptotic achievable SNR after learning, and the total future duration of task engagement), this policy is not achievable in practice and serves as an idealized benchmark to which other models and the rats' trajectory can be compared.

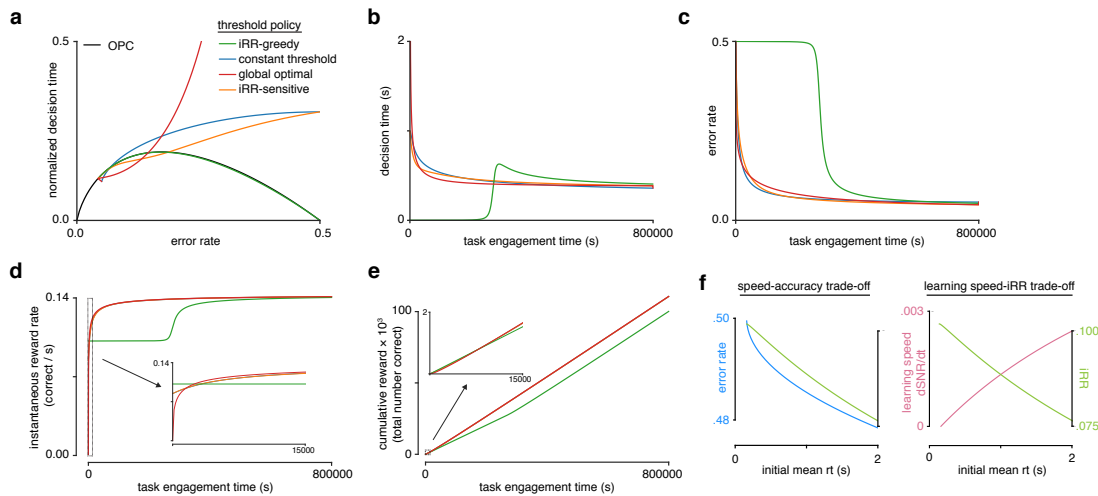

**Figure 3: Model reveals rat learning dynamics lead to higher instantaneous reward rate and long-term rewards than greedily maximizing instantaneous reward rate.** (a) Model learning trajectories in speed-accuracy space plotted against the OPC (black). (b) Decision time through learning for the four different threshold policies in a. (c) Error rate throughout learning for the four different threshold policies in a. (d) Instantaneous reward rate as a function of task engagement time for the full learning trajectory and a zoom-in on the beginning of learning (*inset*). (e) Cumulative reward as a function of task engagement time for the full learning trajectory and a zoom-in on the beginning of learning (*inset*). Threshold policies: iRR-greedy (green), constant threshold (blue), iRR-sensitive (orange) and global optimal (red). (f) In the speed-accuracy trade-off (*left*), ER (blue) decreases with increasing initial mean RT. iRR (green) at high error rates ( $\sim 0.5$ ) also decreases with increasing initial mean RT. Thus, at high ERs, an agent solves the speed-accuracy trade-off by choosing fast RTs that result in higher ERs and maximize iRR. In the learning speed/iRR trade-off (*right*), initial learning speed ( $dSNR/dt$ , pink) increases with increasing initial mean RT, whereas iRR (green) follows the opposite trend. Thus, an agent must trade iRR in order to access higher learning speeds. Plots generated using LDDM model.

144  
145  
146  
147  
148  
149  
150  
151  
152

In order to qualitatively understand how these models behave through time, we visualized their learning dynamics. To approximately place the LDDM task parameters in a similar space to the rats, we performed maximum likelihood fitting using automatic differentiation through the discretized reduction dynamics (see METHODS). The four policies we considered clustered into two groups, distinguished by their behavior early in learning. A “greedy” group, which contained just the iRR-greedy policy, remained always on the OPC (Fig. 3a), and had fast initial response times (Fig. 3b), a long initial period at high error (Fig. 3c), and high initial iRR (Fig. 3d). By contrast, a “non-greedy” group, which contained the iRR-sensitive, constant, and global optimal policies, started far above the OPC (Fig. 3a), and had slow initial response times (Fig. 3b), rapid improvements in ER (Fig. 3c), and low iRR (Fig. 3d). Notably,

153 while members of the non-greedy group started off with lower iRR, they rapidly surpassed the slow  
154 learning group (Fig. 3d) and ultimately accrued more total reward (Fig. 3e). Overall, these results show  
155 that threshold strategy strongly impacts learning dynamics due to the learning speed/iRR trade-off  
156 (Fig. 3f), and that prioritizing learning speed can achieve higher cumulative reward than prioritizing  
157 instantaneous reward rate.

158 We further analyzed the differences between the three strategies in the non-greedy group. The global  
159 optimal policy selects extremely slow initial DTs to maximize the initial speed of learning. By contrast,  
160 the iRR-sensitive and constant threshold policies start with moderately slow responses. Nevertheless,  
161 we found that these simple strategies accrued 99% of the total reward of the global optimal strategy  
162 (Fig. S6). Hence these more moderate policies, which do not require oracle knowledge of future task  
163 parameters, derive most of the benefit in terms of total reward and may reflect a reasonable approach  
164 when the duration of task engagement is unknown.

165 Considering the rats' trajectories in light of these strategies, their slow responses early in learning  
166 stand in stark contrast to the fast responses of the iRR-greedy policy (c.f. Fig. 2b, Fig. 3a). Equally,  
167 their responses were faster than the extremely slow initial DTs of the global optimal model. Both  
168 the iRR-sensitive and constant threshold models qualitatively matched the rats' learning trajectory.  
169 However, DDM parameter fits of the rats' behavior indicated that their thresholds decreased throughout  
170 learning, ruling out the constant threshold model (Fig. S5, *see METHODS*). Furthermore, subsequent  
171 experiments (Fig. 4) also rule out a simple constant threshold strategy. Consistent with substantial  
172 improvements in perceptual sensitivity through learning, DDM fits to the rats also showed an increase in  
173 drift rate throughout learning (Fig. S5). Similar increases in drift rate have been observed as a universal  
174 feature of learning throughout numerous studies fitting learning data with the DDM [18, 49–53]. These  
175 qualitative comparisons suggest that rats adopt a “non-greedy” strategy that trades initial rewards to  
176 prioritize learning in order to harvest a higher iRR sooner and accrue more total reward over the course  
177 of learning.

## 178 Learning Speed Scales with Reaction Time

179 To test the central prediction of the LDDM that learning (change in SNR) scales with mean DT, we  
180 designed a RT restriction experiment and studied the effects of the restriction on learning in the rats.  
181 Previously trained rats ( $n = 12$ ) were randomly divided into two groups in which they would have to  
182 learn a new stimulus pair while responding above or below their individual mean RTs ('slow' and 'fast')  
183 for the previously trained stimulus pair (Fig. 4a). Before introducing the new stimuli, we carried out  
184 practice sessions with the new timing restrictions to reduce potential effects related to a lack of familiarity  
185 with the new regime. After the restriction, RTs were significantly different between the two groups (Fig.  
186 4b). In the model, we simulated a RT restriction by setting two different DTs (Fig. 4c).

187 We found no difference in initial mean session accuracy between the two groups, followed by signifi-  
188 cantly higher accuracy in the slow group in subsequent sessions (Fig. 4d). The slope of accuracy across  
189 sessions was significantly higher in the slow group (Fig. 4d, *inset*). Importantly, the fast group had a  
190 positive slope and an accuracy above chance by the last session of the experiment, indicating this group  
191 learned (Fig. 4d).

192 Because of the speed-accuracy trade-off in the DDM, however, accuracy could be higher in the slow  
193 group even with no difference in perceptual sensitivity (SNR) or learning speed simply because on average  
194 they view the stimulus for longer during a trial, reflecting a higher threshold. To see if underlying  
195 perceptual sensitivity increased faster in the slow group, we computed the rats' inferred SNR throughout  
196 learning, which takes account of the relationship between RT and ER. The SNR of the slow group  
197 increased faster (Fig. 4e), consistent with a learning speed that scales with DT.

198 We found that the slow group had a lower initial iRR, but that this iRR exceeded that of the fast  
199 group halfway through the experiment (Fig. 4f). Similarly, the slow group trended towards a higher  
200 cumulative reward by the end of the experiment (Fig. 4g). The LDDM qualitatively replicates all of our  
201 behavioral findings (Fig. 4h-k). These results demonstrate the potential total reward benefit of faster  
202 learning, which in this case was a product of enforced slower RTs.

203 Our experiments and simulations demonstrate that longer RTs lead to faster learning and higher  
204 reward for our task setting both *in vivo* and *in silico*. Moreover, they are consistent with the hypothesis  
205 that rats choose high initial RTs in order to prioritize learning and achieve higher iRRs and cumulative  
206 rewards during the task.

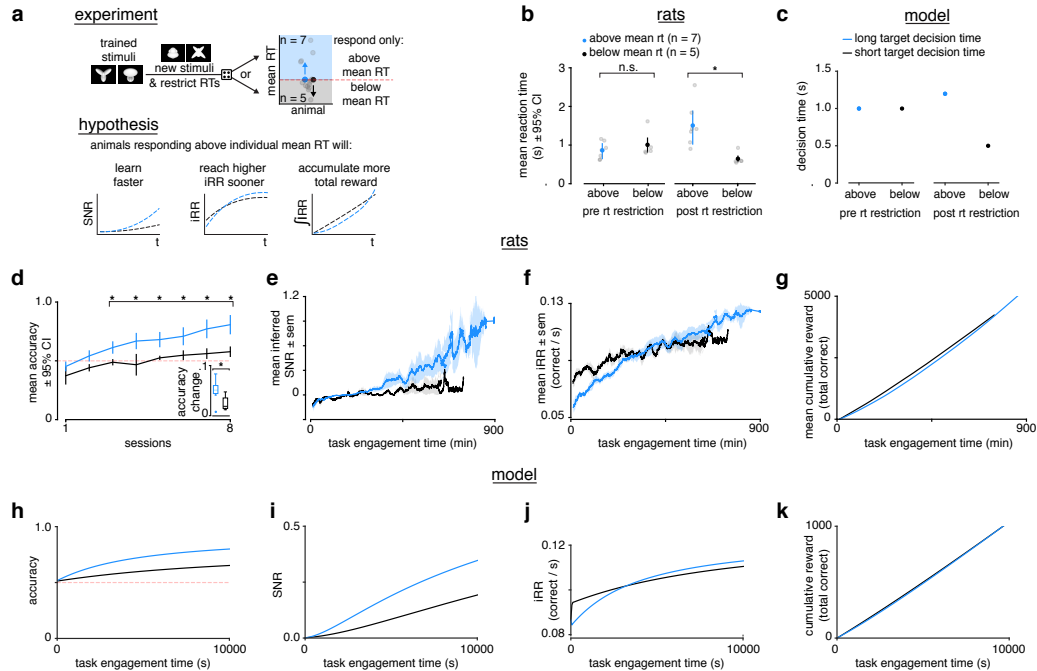

**Figure 4: Longer reaction times lead to faster learning and higher instantaneous reward rates.** (a) Schematic of experiment and hypothesized results. Previously trained animals were randomly divided into two groups: could only respond above (blue,  $n = 7$ ) or below (black,  $n = 5$ ) their individual mean reaction times for the previously trained stimulus and the new stimulus. Subjects responding above their individual mean reaction times were predicted to learn faster, reach a higher instantaneous reward rate sooner and accumulate more total reward. (b) Mean and individual reaction times before and after the reaction time restriction in rats. The mean reaction time for subjects randomly chosen to respond above their individual mean reaction times (blue,  $n = 7$ ) was not significantly different to those randomly chosen to respond below their individual means (black,  $n = 5$ ) before the restriction (Wilcoxon rank-sum test  $p > 0.05$ ), but were significant after the restriction (Wilcoxon rank-sum test  $p < 0.05$ ). Errors represent 95% confidence intervals. (c) In the model a long (blue) and a short target decision time (black) were set. (d) Mean accuracy  $\pm 95\%$  confidence interval across sessions for rats required to respond above (blue,  $n = 7$ ) or below (black,  $n = 5$ ) their individual mean reaction times for a previously trained stimulus. Both groups had initial accuracy below chance because rats assume a response mapping based on an internal assessment of similarity of new stimuli to previously trained stimuli. To counteract this tendency and ensure learning, we chose the response mapping for new stimuli that contradicted the rats' mapping assumption, having the effect of below-chance accuracy at first. \* denotes  $p < 0.05$  in two-sample independent  $t$ -test. Inset: accuracy change (slope of linear fit to accuracy across sessions to both groups, units: fraction per session). \* denotes  $p < 0.05$  in a Wilcoxon rank-sum test. (e) Mean inferred SNR, (f) mean iRR, and (g) mean cumulative reward across task engagement time for new stimulus pair for animals in each group. (h) Accuracy, (i) SNR, (j) iRR and (k) cumulative reward across task engagement time for long (blue) and short (black) target decision times in the LDDM.

207

## Rats Choose Reaction Time Based on Learning Prospects

208

209

210

211

212

213

214

215

216

217

218

219

220

The previous experiments suggest that rats trade initial rewards for faster learning. Nonetheless, it is unclear how much control rats exert over their RTs. A control-free heuristic approach, such as adopting a fixed high threshold (our constant threshold policy), might incidentally appear near optimal for our particular task parameters, but might not be responsive to changed task conditions. If an agent is controlling the reward investment it makes in the service of learning, then it should only make that investment if it is possible to learn.

To test whether the rats' RT modulations were sensitive to learning potential, we conducted a new experiment in which we divided rats into a group that encountered new learnable visible stimuli ( $n = 16$ , sessions = 13), and another that encountered unlearnable transparent or near-transparent stimuli ( $n = 8$ , sessions = 11) (Fig. 5a). From the perspective of the LDDM, both groups start with approximately zero SNR, however only the group with the visible stimuli can improve that SNR. If the rats choose their RTs based on how much it is possible to learn, then: (1) rats encountering stimuli that they can learn will increase their RTs to learn quickly and increase future iRR. (2) Rats encountering stimuli



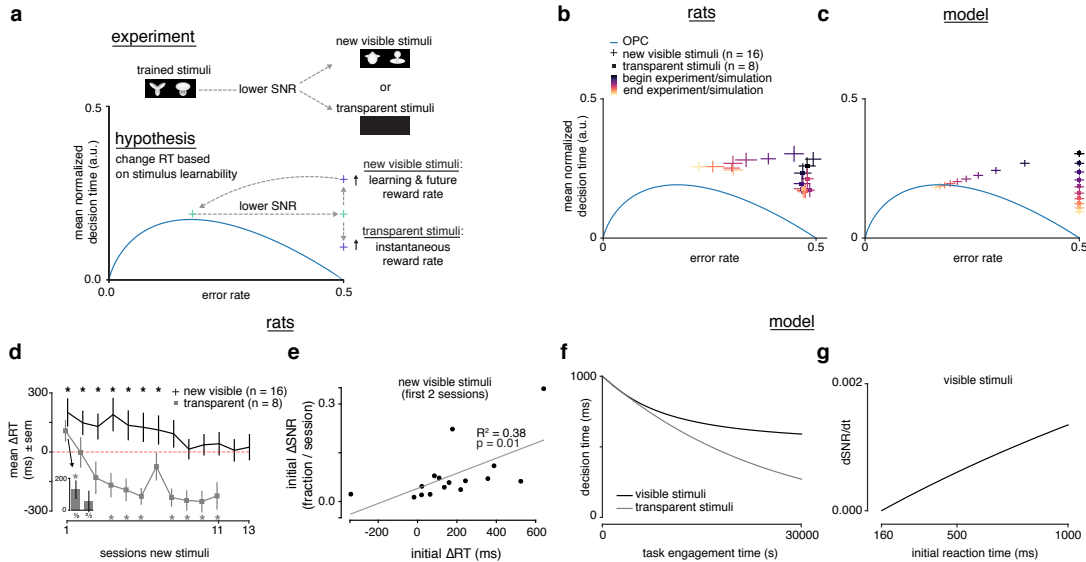

**Figure 5: Rats choose reaction time based on stimulus learnability.** (a) Schematic of experiment: rats trained on stimulus pair 1 were presented with new visible stimulus pair 2 or transparent ( $\alpha = 0, 0.1$ ) stimuli. If rats change their reaction times based on stimulus learnability, they should increase their reaction times for the new visible stimuli to increase learning and future iRR and decrease their reaction time to increase iRR for the transparent stimuli. (b) Learning across normalized sessions in speed-accuracy space for new visible stimuli ( $n = 16$ , crosses) and transparent stimuli ( $n = 8$ , squares). Color map indicates time relative to start and end of the experiment. (c) iRR-sensitive threshold model runs with “visible” (crosses) and “transparent” (squares) stimuli (modeled as containing some signal, and no signal) plotted in speed-accuracy space. The crosses are illustrative and do not reflect any uncertainty. Color map indicates time relative to start and end of simulation. (d) Mean change in reaction time across sessions for visible stimuli or transparent stimuli compared to previously known stimuli. Positive change means an increase relative to previous average. *Inset*: first and second half of first session for transparent stimuli. \* denotes  $p < 0.05$  in permutation test. (e) Correlation between initial individual mean change in reaction time (quantity in d) and change in SNR (learning speed: slope of linear fit to SNR per session) for first two sessions with new visible stimuli.  $R^2$  and  $p$  from linear regression in d. Error bars reflect standard error of the mean in b and d. (f) Decision time across time engagement time for visible and transparent stimuli runs in model simulation. (g) Instantaneous change in SNR ( $dSNR/dt$ ) as a function of initial reaction time (decision time + non-decision time  $t_0$ ) in model simulation.

221  
222  
223  
224  
225  
226  
227  
228  
229  
230  
231  
232  
233  
234  
235  
236  
237  
238  
239  
240  
241  
242

that they cannot learn might first increase their RTs to learn that there is nothing to learn, but (3) will subsequently decrease RTs to maximize iRR.

We found that the rats with the visible stimuli qualitatively replicated the same trajectory in speed-accuracy space that we found when rats were trained for the first time (Fig. 2b, Fig. 5b). Because these previously trained rats had already mastered the task mechanics, this result rules out non-stimulus-related learning effects as the primary explanation for long RTs at the beginning of learning. Any slowdown in RT in this experiment was only attributable to stimulus changes. We calculated the mean change in RT (mean  $\Delta RT$ ) of new stimuli versus known stimuli. The visible stimuli group had a significant slow-down in RT lasting many sessions that returned to baseline by the end of the experiment (Fig. 5d, black trace).

Rats with the transparent stimuli also approached the OPC by decreasing their RTs across sessions to better maximize iRR (Fig. 5b). After a brief initial slow-down in RT in the first half of the first session (Fig. 5d, *inset*), RTs rapidly decreased (Fig. 5d, grey trace). Notably, RTs fell below the baseline RTs, indicating a strategy of responding quickly, which is iRR-optimal for this zero SNR task. Hence rodents are capable of modulating their strategy depending on their learning prospects.

This experiment also argues against several simple strategies for choosing reaction times. If rats respond more slowly after error trials, a phenomenon known as post-error slowing (PES), they might exhibit slower RTs early in learning when errors are frequent [54]. Indeed, we found a slight mean PES effect of about 50ms that was on average constant throughout learning, though it was highly variable across individuals (Fig. S7). However, rats viewing transparent stimuli had ERs constrained to 50%, yet their RTs systematically decreased (Fig. 5b), such that PES alone cannot account for their strategy. Similarly, choosing RTs as a simple function of time since encountering a task would not explain the difference in RT trajectories between visible and transparent stimuli (Fig. 5d).

243  
244  
245  
246  
247  
248  
249  
250  
251  
252  
253  
254  
255  
256  
257  
258  
259  
260

A simulation of this experiment with the iRR-sensitive threshold LDDM model qualitatively replicated the rats' behavior (Fig. 5c, f, g). Rodent behavior is thus consistent with a threshold policy that starts with a relatively long DT upon encountering a new task, and then decays towards the iRR-optimal DT. All other threshold strategies we considered fail to account for the totality of the results. The iRR-greedy strategy—as before—stays pinned to the OPC and speeds up upon encountering the novel stimuli rather than slowing down. The constant threshold strategy fails to predict the speedup in DT for the transparent stimuli. Finally, the global optimal strategy (which has oracle knowledge of the prospects for learning in each task) behaves like the iRR-greedy policy from the start on the transparent stimuli as there is nothing to learn.

Our RT restriction experiment showed that higher initial RTs led to faster learning, a higher iRR and more cumulative reward. Consistent with these findings, there was a correlation between initial mean  $\Delta RT$  and initial  $\Delta SNR$  across subjects viewing the visible stimuli, indicating the more an animal slowed down, the faster it learned (Fig. 5e). We further tested these results in the voluntary setting by tracking iRR and cumulative reward for the rats in the learnable stimuli setting with the largest (blue,  $n = 4$ ) and smallest (black,  $n = 4$ ) “self-imposed” change in RT (Fig. 6a). The rats with the largest change started with a lower but ended with a higher mean iRR, and collected more cumulative reward (Fig. 6b, c). Thus, in the voluntary setting there is a clear relationship between RT, learning speed, and its total reward benefits.

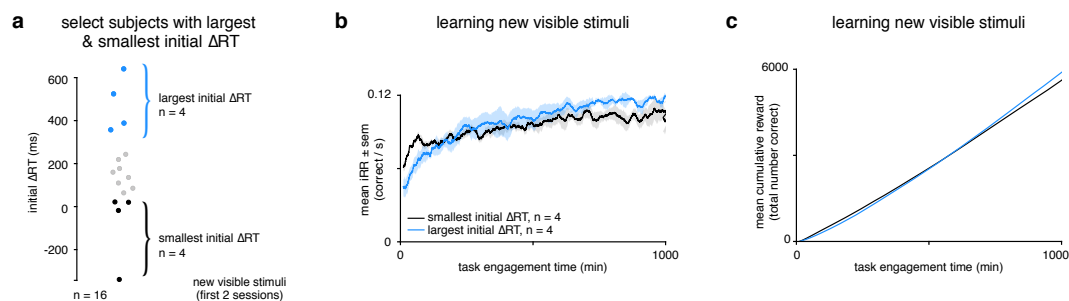

Figure 6: **Rats that slowed down reaction times the most reached a higher instantaneous reward rate sooner and collected more reward.** **(a)** Schematic showing segregation of top 25% of subjects ( $n = 4$ ) with the largest initial  $\Delta RT$ s for the new visible stimuli and the bottom 25% of subjects ( $n = 4$ ) with the smallest initial  $\Delta RT$ s. Initial  $\Delta RT$ s were calculated as an average of the first 2 sessions for all subjects. **(b)** Mean iRR for subjects with largest and smallest mean changes in reaction time across task engagement time. **(c)** Mean cumulative reward over task engagement time for subjects as in **b**.

261

## Discussion

262  
263  
264  
265  
266  
267  
268  
269  
270  
271  
272  
273  
274  
275  
276  
277  
278  
279

Our theoretical and empirical results identify a trade-off between the need to learn rapidly and the need to accrue immediate reward in a perceptual decision making task. We find that rats adapt their decision strategy to improve learning speed and approximately maximize total reward, effectively navigating this trade-off over the total period of task engagement. In our experiments, rats responded slowly upon encountering novel stimuli, but only when there was a visual stimulus to learn from, indicating they chose to respond more slowly in order to learn quickly. This behavior requires foregoing both a cognitively easier strategy—guessing as quickly as possible—and relinquishing a higher immediately available reward for several sessions spanning multiple days. By imposing different response times in groups of animals, we empirically verified our theoretical prediction that slow responses lead to faster learning and greater total reward in our task. These findings collectively show that rats exhibit cognitive control of the learning process, that is, the ability to engage in goal-directed behavior that would otherwise conflict with default or more immediately rewarding responses [22, 55–57].

Our high-throughput behavioral study with a controlled training protocol permits examination of the entire trajectory of learning, revealing hallmarks of non-greedy decision making. Nonetheless, it is accompanied by several experimental limitations. Our estimation of SNR improvements during learning relies on the drift-diffusion model. Importantly, while this approach has been widely used in prior work [18, 35, 49, 58], our conclusions are predicated on this model's approximate validity for our task. Future work could address this issue by using a paradigm in which learners with different response deadlines

280 are tested at the same fixed response deadline, equalizing the impact of stimulus exposure at test. This  
281 model-free paradigm is not trivial in rodents, because response deadlines cannot be rapidly instructed.  
282 Our study also focuses on one visual perceptual task. Further work should verify our findings with other  
283 perceptual tasks across difficulties, modalities, and organisms.

284 To understand possible learning trajectories, we introduced a theoretical framework based on a re-  
285 current neural network, and from this derived a learning drift-diffusion model. The LDDM extends the  
286 canonical drift-diffusion framework to incorporate long-term perceptual learning, and formalizes a trade-  
287 off between learning speed and instantaneous reward. However, it remains approximate and limited in  
288 several ways. The LDDM builds off the simplest form of a drift-diffusion model, and various exten-  
289 sions and related models have been proposed to better fit behavioral data, including urgency signals [47,  
290 59–62], history-dependent effects [63–69], imperfect sensory integration [35], confidence [58, 70, 71], and  
291 multi-alternative choices [72, 73]. More broadly, it remains unclear whether the drift-diffusion framework  
292 in fact underlies perceptual decision making, with a variety of other proposals providing differing ac-  
293 counts [38, 74, 75]. We speculate that the qualitative learning speed/instantaneous reward rate trade-off  
294 that we formally derive in the LDDM would also arise in other models of within-trial decision making  
295 dynamics. In addition, on a long timescale over many trials, the LDDM improves performance through  
296 error-corrective learning. Future work could investigate learning dynamics under other proposed learning  
297 algorithms such as feedback alignment [76], node perturbation [77], or reinforcement learning [33].

298 Conceptually, the learning speed/instantaneous reward rate trade-off is related to the explore/exploit  
299 trade-off common in reinforcement learning, but differs in detail. As traditionally framed in reinforcement  
300 learning, exploration permits sampling of the value associated with fully observable states and actions  
301 [78, 79]. By contrast, in our setting, the value of each action given object identity is clear, but object  
302 identity must be inferred from noisy measurements over time [80]. Exploration of the stimulus through  
303 long decision times permits integration of enough stimulus information such that error feedback reliably  
304 identifies informative stimulus features, improving future state inferences. Our trade-off therefore reflects  
305 a perceptual rather than value-based learning process. However, because there are reward benefits to  
306 improving future state inferences, this perceptual learning process is also necessarily value-based. The  
307 distinction between perceptual and value-based decision making may be due to the fact that they have  
308 been studied with paradigms obviating one another [81]. Even though our task was one with known  
309 decision values, the focus on learning revealed the value-based components of a perceptual learning  
310 process. Advances in deep reinforcement learning, where the marriage of perceptual learning mechanisms  
311 from deep learning and value-based learning mechanisms in reinforcement learning are an exciting avenue  
312 to further understand biological learning [82]. State-of-the-art deep reinforcement learning agents, which  
313 succeed in navigating the traditional explore/exploit dilemma on complicated tasks like Atari games,  
314 nevertheless fail to learn perceptual decisions like those considered here [83]. Our findings may offer  
315 routes to improving these artificial systems.

316 In order to navigate the learning speed/instantaneous reward rate trade-off, our findings suggest that  
317 rats deploy cognitive control of the learning process. Cognitive control has been defined as the allocation  
318 of mental faculties for goal-directed behavior over other default or more immediately rewarding behaviors  
319 [57]. Two main features of cognitive control govern its use: it is limited [84], and it is costly [55, 85–90]. If  
320 control is costly, then its application needs to be justified by the benefits of its application. The *Expected*  
321 *Value of Control (EVC)* theory posits that control is allocated in proportion to the expected value of  
322 control [56]. Previous work demonstrated that rats are capable of the economic reasoning required for  
323 optimal control allocation [91–93]. We demonstrated that rats incur a substantial initial instantaneous  
324 reward rate opportunity cost to learn the task more quickly, foregoing a cognitively less demanding fast  
325 guessing strategy that would yield higher initial rewards. Rather than optimizing instantaneous reward  
326 rate, which has been the focus of prior theories [9, 10, 18], our analysis suggests that rats approximately  
327 optimize total reward over task engagement. Relinquishing initial reward to learn faster, a cognitively  
328 costly strategy, is justified by a larger total reward over task engagement.

329 Assessing the expected value of learning in a new task requires knowing how much can be learned  
330 and how long the task will be performed. Neither of these quantities is directly observable upon first  
331 encountering a new task, opening the question of how rodents know to slow down in one task but not  
332 another. Importantly, rats only traded reward for information when learning was possible, a result in  
333 line with data demonstrating that humans are more likely to trade reward for information during long  
334 experimental time horizons, when learning is more likely [94]. Moreover, previous work has highlighted  
335 the explicit opportunity cost of longer deliberation times [47], a trade-off that will differ during learning  
336 and at asymptotic performance, as we demonstrate here. One possibility is that rats estimate learnability  
337 and task duration through meta-learning processes that learn to estimate the value of learning through  
338 experience with many tasks [95–97]. The amount of control allocated to learning the current task could

339 be proportional to its estimated value, determined based on similarity to previous learning situations  
340 and their reward outcomes and control costs [98]. Previous observations of suboptimal decision times  
341 in humans analogous to those we observed in rats [11, 18, 30, 31], might reflect incomplete learning, or  
342 subjects who think they still have more to learn. Future work could test further predictions emerging  
343 from a control-based theory of learning. An agent should assess both the predicted duration of task  
344 engagement and the predicted difficulty of learning in order to determine the optimal decision making  
345 strategy early in learning, and this can be tested by, for instance, manipulating the time horizon and  
346 difficulty of the task.

347 The trend of a decrease in response time and an increase in accuracy through practice—which we  
348 observed in our rats—has been widely observed for decades in the skill acquisition literature, and is  
349 known as the *Law of Practice* [99–102]. Accounts of the Law of Practice have posited a cognitive control-  
350 mediated transition from shared/controlled to separate/automatic representations of skills with practice  
351 [101, 103–105]. On this view, control mechanisms are a limited, slow resource that impose unwanted  
352 processing delays. Our results suggest an alternative non-mutually-exclusive reward-based account for  
353 why we may so ubiquitously observe the Law of Practice. Slow responses early in learning may be  
354 the goal of cognitive control, as they allow for faster learning, and faster learning leads to higher total  
355 reward. When faced with the ever-changing tasks furnished by naturalistic environments, it is the speed  
356 of learning which may exert the strongest impact on total reward.

## 357 Acknowledgments

358 We thank Chris Baldassano, Christopher Summerfield, Rahul Bhui and Grigori Guitchounts for useful  
359 discussions. We thank Joshua Breedon for summer assistance in developing faster animal training proce-  
360 dures. We thank Ed Soucy and the NeuroTechnology Core for help with improvements to the behavioral  
361 response rigs. This work was supported by the Richard A. and Susan F. Smith Family Foundation and  
362 IARPA contract # D16PC00002. J.M. was supported by the Harvard Brain Science Initiative (HBI) and  
363 the Department of Molecular and Cellular Biology at Harvard, and a Presidential Postdoctoral Research  
364 Fellowship at Princeton. A.M.S. was supported by a Swartz Postdoctoral Fellowship in Theoretical Neu-  
365 roscience and a Sir Henry Dale Fellowship from the Wellcome Trust and Royal Society (Grant Number  
366 216386/Z/19/Z).

## 367 Author Contributions

368 J.M. and A.M.S. conceived the work, designed, ran and analyzed the experiments and simulations, and  
369 wrote the paper. D.D.C. provided input to experimental design. T.C. aided J.M. in establishing initial  
370 operant training procedures and behavioral analysis. J.Y.R. designed the behavioral response rigs.

## 371 Competing Interests

372 The authors declare no competing interests.

## 373 Methods

### 374 Behavioral Training

#### 375 Subjects

376 All care and experimental manipulation of animals were reviewed and approved by the Harvard In-  
377 stitutional Animal Care and Use Committee. We trained animals on a high-throughput visual object  
378 recognition task that has been previously described [34]. A total of 44 female Long-Evans rats were used  
379 for this study, with 38 included in analyses. Twenty-eight rats (AK1–12 & AL1–16) initiated training  
380 on stimulus pair 1, and 26 completed it (AK8 and AL12 failed to learn). Another 8 animals (AM1–8)  
381 were trained on stimulus pair 1 but were not included in the initial analysis focusing on asymptotic  
382 performance and learning (Fig. 1d, e; Fig. 2) because they were trained after the analyses had been  
383 completed. Subjects AM5–8, although trained, did not participate in other behavioral experiments so  
384 do not appear in this study. Sixteen animals (AL1–8, AL13–16 & AM1–8) participated in learning  
385 stimulus pair 2 (“new visible stimuli”; canonical only training regime) while 10 animals (AK1–3, 5–7,

386 9–12) initially participated in viewing transparent ( $\alpha = 0$ ; AK1, 3, 6, 7, 11) or near-transparent  
387 stimuli ( $\alpha = 0.1$ ; AK2, 5, 9, 10, 12), with the subjects sorted randomly into each group. The trans-  
388 parent and near-transparent groups were aggregated but 2 animals from the near-transparent group were  
389 excluded for performing above chance (AK5 & AK12) as this experiment focused on the effects of stimuli  
390 that could not be learned. The same 16 animals used for stimulus pair 2 were used for learning stimulus  
391 pair 3 under two different reaction time restrictions in which the subjects were sorted randomly. One rat  
392 (AL1) was excluded from the outset for not having learned stimulus pair 2. Two additional rats (AL4 &  
393 AL7) were excluded for not completing enough trials during practice sessions with the new reaction time  
394 restrictions. A final rat (AM1) was excluded because it failed to learn the task. The 12 remaining rats  
395 were grouped into 7 subjects required to respond above (AL3, AL8, AL13, AL15, AL16, AM3, AM4)  
396 and 5 subjects required to respond below their individual average reaction times (AL2, AL5, AL6, AL14,  
397 AM2). Finally, 8 rats (AN1–8) were trained on a simplified training regime (“canonical only”) used as  
398 a control for the typical “size & rotation” training object recognition regime (described below). Table  
399 S1 summarizes individual subject participation across behavioral experiments.

## 400 Behavioral Training Boxes

401 Rats were trained in high-throughput behavioral training rigs, each made up of 4 vertically stacked  
402 behavioral training boxes. In order to enter the behavioral training boxes, the animals were first indi-  
403 vidualy transferred from their home cages to temporary plastic housing cages that would slip into the  
404 behavioral training boxes and snap into place. Each plastic cage had a porthole in front where the ani-  
405 mals could stick out their head. In front of the animal in the behavior boxes were three easily accessible  
406 stainless steel lickports electrically coupled to capacitive sensors, and a computer monitor (Dell P190S,  
407 Round Rock, TX; Samsung 943-BT, Seoul, South Korea) at approximately  $40^\circ$  visual angle from the  
408 rats’ location. The three sensors were arranged in a straight horizontal line approximately a centimeter  
409 apart and at mouth-height for the rats. The two side ports (L/R) were connected to syringe pumps (New  
410 Era Pump Systems, Inc. NE-500, Farmingdale, NY) that would automatically dispense water upon a  
411 correct trial. The center port was connected to a syringe that was used to manually dispense water dur-  
412 ing the initial phases of training (see below). Each behavior box was equipped with a computer (Apple  
413 Macmini 6,1 running OsX 10.9.5 [13F34] or Macmini 7,1 running OSX El Capitan 10.11.13, Cupertino,  
414 CA) running MWorks, an open source software for running real-time behavioral experiments (MWorks  
415 0.5.dev [d7c9069] or 0.6 [c186e7], The MWorks Project <https://mworks.github.io/>). The capacitive sen-  
416 sors (Phidget Touch Sensor P/N 1129\_1, Calgary, Alberta, Canada) were controlled by a microcontroller  
417 (Phidget Interface Kit 8/8/8 P/N 1018.2) that was connected via USB to the computer. The syringe  
418 pumps were connected to the computer via an RS232 adapter (Startech RS-232/422/485 Serial over IP  
419 Ethernet Device Server, Lockbourne, OH). To allow the experimenter visual access to the rats’ behavior,  
420 each box was, in addition, illuminated with red LEDs, not visible to the rats.

## 421 Habituation

422 Long-Evans rats (Charles River Laboratories, Wilmington, MA) of about 250 g were allowed to acclimate  
423 to the laboratory environment upon arrival for about a week. After acclimation, they were habituated  
424 to humans for one or two days. The habituation procedure involved petting and transfer of the rats  
425 from their cage to the experimenter’s lap until the animals were comfortable with the handling. Once  
426 habituated to handling, the rats were introduced to the training environment. To allow the animals to  
427 get used to the training plastic cages, the feedback sounds generated by the behavior rigs, and to become  
428 comfortable in the behavior training room, they were transferred to the temporary plastic cages used in  
429 our high-throughput behavioral training rigs and kept in the training room for the duration of a training  
430 session undergone by a set of trained animals. This procedure was repeated after water deprivation, and  
431 during the training session undergone by the trained animals, the new animals were taught to poke their  
432 head out of a porthole available in each plastic cage to receive a water reward from a handheld syringe  
433 connected to a lickport identical to the ones in the behavior training boxes in the training rigs. Once  
434 the animals reliably stuck their head out of the porthole (one or two days) and accessed water from the  
435 syringe, they were moved into the behavior boxes.

## 436 Early Shaping

437 On their first day in the behavior boxes, rats were individually tutored as follows: Water reward was  
438 manually dispensed from the center lickport which is normally used to initiate a trial. When the animal  
439 licked the center lickport, a trial began. After a 500 ms tone period, one of two visual objects (stimulus

440 pair 1) appeared on the screen (large front view, degree of visual angle  $40^\circ$ ) chosen pseudo-randomly  
441 (three randomly consecutive presentations of one stimulus resulted in a subsequent presentation of the  
442 other stimulus). This appearance was followed by a 350 ms minimum reaction time that was instituted to  
443 promote visual processing of the stimuli. If the animal licked one of the side (L/R) lickports during this  
444 time, then the trial was aborted, there would be a minimum intertrial time (1300 ms), and the process  
445 would begin again.

446 At the time of stimulus presentation, a free water reward was dispensed from the correct side (L/R)  
447 lickport. If the animals licked the correct side lickport within the allotted amount of time (3500 ms) then  
448 an additional reward was automatically dispensed from that port. This portion of training was meant to  
449 begin teaching the animals the task mechanics, that is to first lick the center port, and then one of the  
450 two side ports.

451 After the rats were sufficiently engaged with the lickports and began self-initiating trials by licking  
452 the center lickport (usually 1 to several days, determined by experimenter) no more water was dispensed  
453 manually through the center lickport, but the free water rewards from the side lickports were still given.  
454 Once the rats were self-initiating enough trials without manual rewards from the center lickport ( $>200$   
455 per session), the free reward condition was stopped, and only correct responses were rewarded.

## 456 Training

457 Data collection for this study began once the rats had demonstrated proficiency of the task mechanics  
458 (as described above). The training curriculum followed was similar to that by Zoccolan and colleagues  
459 [34]. Rats performed the task for about 2 hours daily. Initially, the rats were only presented with large  
460 front views ( $40^\circ$  visual angle,  $0^\circ$  of rotation) of the two stimuli (stimulus pair 1). Once the rats reached  
461 a performance level of  $\geq 70\%$  with these views, the stimuli decreased in size to  $15^\circ$  visual angle in a  
462 staircased fashion with steps of  $2.5^\circ$  visual angle. Once the rats reached  $15^\circ$  visual angle, rotations of  
463 the stimuli to the left or right were staircased in steps of  $5^\circ$  at a constant size of  $30^\circ$  visual angle. Once  
464 the rats reached  $\pm 60^\circ$  of rotation, they were considered to have completed training and were presented  
465 with random transformations of the stimuli at different sizes ( $15^\circ$  to  $40^\circ$  visual angle, step =  $15^\circ$ ;  $0^\circ$  of  
466 rotation) or different rotations ( $-60$  to  $+60^\circ$  of rotation, step =  $15^\circ$ ;  $30^\circ$  visual angle). After this point,  
467 ten additional training sessions were collected to allow the animals' performance to stabilize with this  
468 expanded stimulus set.

469 During training, there was a bias correction that tracked the animals' tendency to be biased to one  
470 side. If biased, stimuli mapped to the unbiased side were presented for a maximum of 3 consecutive  
471 trials. For example, if the bias correction detected an animal was biased to the right, the left-mapped  
472 stimulus would appear three trials at a time in a non-random fashion and the animals' performance  
473 would drop from 50% to 25%, reducing the advantageousness of a biased strategy dramatically. If the  
474 animals continued to exhibit bias after one or two sessions of bias correction, then the limit was pushed  
475 to 5 consecutive trials. Once the bias disappeared, stimulus presentation resumed in a pseudo-random  
476 fashion.

477 The left/right mapping of the stimuli to lickports was counterbalanced across animals, ruling out  
478 any effects related left/right stimulus-independent biases, or left/right-independent stimulus bias across  
479 animals.

## 480 Training Regime Comparison

481 Although object recognition is supposed to be a fairly automatic process [106], it is possible that the 14  
482 possible presentations of each stimulus of stimulus pair 1 (6 sizes at constant rotation, and 8 rotations  
483 at constant size) varied in difficulty. To rule out any possible difficulty effects during training and at  
484 asymptotic performance, We trained  $n = 8$  different rats to asymptotic performance on the task but  
485 only on large, front-views of the visual objects (Fig. S8a). We compared the learning and asymptotic  
486 performance of the "size & rotation" cohort and the "canonical only" cohort across a wide range of  
487 behavioral measures. During learning, animals in both regimes followed similar learning trajectories in  
488 speed accuracy space (Fig. S8b), and clustered around the OPC at asymptotic performance (Fig. S8c).  
489 Comparisons of accuracy, reaction time, and fraction maximum instantaneous reward rate trajectories  
490 during learning and at averages asymptotic performance revealed no detectable differences (Fig. S8d—f).  
491 Total trials per session, and voluntary intertrial intervals after error trials did show slightly varied tra-  
492 jectories during learning, though there were no differences in their means after learning (Fig. S8g, h).  
493 The difference in total trials per session could be unrelated to the difference in training regimes. The  
494 difference in voluntary intertrial intervals, however, could be related to the introduction of different sizes

495 and rotations: a sudden spike in this metric is seen about halfway through normalized sessions and decays  
496 over time. If this is the case, it is a curious result that rats choose to display their purported “surprise”  
497 in-between trials, and not during trials, as we found no difference in the reaction time trajectories. Both  
498 training regimes had overlapping fraction trials ignored metrics during learning, with a sharp decrease  
499 after the start, and a small significant difference in their number at asymptotic performance (Fig. S8i).  
500 We point out the fact that we do not consider voluntary intertrial intervals nor ignored trials in our  
501 analysis, so the differences between the regimes do not affect our conclusions. Overall, these results  
502 suggest that there is not a measurable or relevant difficulty effect based on our training regime with a  
503 variety of stimulus presentations.

## 504 **Stimulus Learnability Experiment**

505 TRANSPARENT STIMULI. In order to assess how animals behaved in a scenario with non-existent learning  
506 potential, a subset of already well-trained animals were presented with transparent ( $n = 5$ ,  $\alpha = 0$ ) or near-transparent ( $n = 5$ ,  $\alpha = 0.1$ ) versions of the familiar stimulus pair 1 for a duration of  
507 11 sessions. Before these sessions, four sessions with stimulus pair 1 at full opacity ( $\alpha = 1$ ) were  
508 conducted to ensure animals could perform the task adequately before the manipulation. We predicted  
509 that the near-transparent condition would segregate animals into two groups, those that could perform  
510 the task and those that could not, based on each individual’s perceptual ability. The animals in the  
511 near-transparent condition that remained around chance performance ( $n = 3$ , rat AK2, AK9 & AK10)  
512 were grouped with the animals from the transparent condition, while those that performed well above  
513 chance ( $n = 2$ , rat AK5 & AK12) were excluded.

514  
515 Reaction times were predicted to decrease during the course of the experiment, so to measure the  
516 change most effectively, the minimum reaction time requirement of 350 ms was removed. However,  
517 removing the requirement could lead to reduced reaction times regardless of the presented stimuli. To be  
518 able to measure whether the transparent stimuli led to a significant difference in reaction times compared  
519 to visible stimuli, we ran sessions with visible stimuli with no reaction time requirement for the same  
520 animals and compared these reaction times with those from the transparent condition. We found that the  
521 aggregate reaction time distributions were significantly different (Fig. S9a). A comparison of Vincentized  
522 reaction times revealed that there was a significant difference in the fastest reaction time decile (Fig.  
523 S9b), confirming that reaction times decreased significantly during presentation of transparent stimuli.

524 NEW VISIBLE STIMULI. In order to assess how animals behaved in a scenario with high learning potential,  
525 a subset ( $n = 16$ ) of already well-trained animals on stimulus pair 1 were presented with a never before  
526 seen stimulus pair (stimulus pair 2) for a duration of 13 sessions. Before these sessions, 5 sessions  
527 with the familiar stimulus pair 1 were recorded immediately preceding the stimulus pair 2 sessions in  
528 order to compare performance and reaction time after the manipulation for every animal. Previous pilot  
529 experiments showed that the animals immediately assigned a left/right mapping to the new stimuli based  
530 on presumed similarity to previously trained stimulus pair, so in order to enforce learning, the left/right  
531 mapping contrary to that predicted by the animals in the pilot tests was chosen. Because of this, animals  
532 typically began with an accuracy below 50%, as they first had to undergo reversal learning for their initial  
533 mapping assumptions. Because the goal of this experiment was to measure effects during learning and  
534 not demonstrate invariant object recognition, the new stimuli were presented in large front views only  
535 (visual angle =  $40^\circ$ , rotation =  $0^\circ$ ).

## 536 **Behavioral Data Analysis**

### 537 **Software**

538 Behavioral psychophysical data was recorded using the open-source MWorks 0.5.1 and 0.6 software  
539 (<https://mworks.github.io/downloads/>). The data were analyzed using Python 2.7 with the pymworks  
540 extension.

### 541 **Drift-Diffusion Model Fit**

542 In order to verify that our behavioral data could be modeled as a drift-diffusion process, the data were  
543 fit with a hierarchical drift-diffusion model [107], permitting subsequent analysis (such as comparison  
544 to the optimal performance curve) based on the assumption of a drift-diffusion process (Fig. S3). In  
545 order to assess parameter changes across learning, we fit the DDM to the start and end of learning for  
546 both stimulus pair 1 and stimulus pair 2, the first and second set of stimuli learned by the animals (Fig.

547 S5). Drift rates increased and thresholds decreased by the end of learning, in agreement with previous  
548 findings [18, 49–53].

## 549 Behavioral Metrics

550 ERROR RATE (ER) was calculated by dividing the number of error trials by the number of total trials  
551 (error + correct) within a given window of trials or a the trials in a full behavioral training session.  
552 Accuracy was calculated as  $1 - ER$ .

$$ER = \frac{\text{error trials}}{\text{total trials}} \quad (4)$$

$$\text{Accuracy} = 1 - ER \quad (5)$$

553 REACTION TIME (RT) for one trial was measured by subtracting the time of the first lick on a response  
554 lickport from the stimulus onset time on the computer monitor. Mean RT was calculated by averaging  
555 reaction times across trials within a given window of trials or the trials in a full behavioral training  
556 session.

$$\langle RT \rangle = \frac{1}{n} \sum_{\text{trial } i=1}^{\text{trial } n} RT_i \quad (6)$$

557 VINCENTIZED REACTION TIME is one method to report aggregate reaction time data meant to preserve  
558 individual distribution shape and be less sensitive to outliers in the group distribution [108, 109], al-  
559 though some scientists have argued parametric fitting (with an ex-Gaussian distribution, for example)  
560 and parameter averaging across subjects outperforms Vincentizing as sample size increases [110, 111].  
561 Each subject's reaction time distribution is divided into quantiles (*e.g.* deciles; similar to percentile, but  
562 between 0 and 1), and then the quantiles across subjects are averaged.

563 DECISION TIME (DT) for one trial was measured by subtracting the non-decision time  $T_0$  (*see* ESTI-  
564 MATING  $T_0$ ) from RT. Mean DT  $\langle DT \rangle$  was calculated by subtracting  $T_0$  from the mean RT  $\langle RT \rangle$  across  
565 trials within a given window of trials or the trials in a full behavioral training session.

$$\langle DT \rangle = \langle RT \rangle - T_0 \quad (7)$$

566

567 MEAN NORMALIZED DECISION TIME  $\langle DT \rangle / D_{\text{TOT}}$  was measured by dividing mean DT  $\langle DT \rangle$  by  $D_{\text{tot}}$ , the  
568 sum of the non-decision time  $T_0$  and  $D_{\text{RSI}}$ , the mean response-to-stimulus interval (*see* DETERMINING  
569  $D_{\text{RSI}}$ ,  $D_{\text{ERR}}$ ,  $D_{\text{CORR}}$ ).

$$\frac{\langle DT \rangle}{D_{\text{tot}}} = \frac{\langle RT \rangle - T_0}{T_0 + D_{\text{RSI}}} \quad (8)$$

570 MEAN DIFFERENCE IN MEAN REACTION TIME  $\Delta RT$  was calculated by subtracting the mean reaction  
571 time of a number of baseline sessions from the mean reaction time of an experimental session. A positive  
572 difference indicates an increase over baseline mean reaction time. The mean of the two immediately  
573 preceding sessions with stimulus pair 1 were subtracted from the mean reaction time of every session  
574 with stimulus pair 2 or transparent stimuli for every animal individually (Fig. 5d, e). These differences  
575 were then averaged to get a mean difference in mean reaction time  $\Delta RT$ .

576 MEAN REWARD RATE  $\langle RR \rangle$  is defined as mean accuracy per mean time per trial [9]:

$$\langle RR \rangle = \frac{\text{mean accuracy}}{\text{mean time per trial}} \quad (9)$$

577 The mean time per trial is composed of the mean decision time  $\langle DT \rangle$ , non-decision-time  $T_0$ , the  
578 post-error time  $D_{\text{err}}$  (*see* DETERMINING  $D_{\text{RSI}}$ ,  $D_{\text{ERR}}$ ,  $D_{\text{CORR}}$ ) scaled by the fraction of errors, and the  
579 post-correct time  $D_{\text{corr}}$  scaled by the fraction of correct choices:

$$\text{mean time per trial} = \langle DT \rangle + T_0 + (1 - ER)D_{\text{corr}}ER \cdot D_{\text{err}} \quad (10)$$

580 If we define  $D_p$  as the extra penalty time, that is, the difference between  $D_{\text{err}}$  and  $D_{\text{corr}}$ :

$$D_p = D_{\text{err}} - D_{\text{corr}} \quad (11)$$



581

We can calculate the mean reward rate by equation A26 in Bogacz et al, 2006[10]:

$$\langle RR \rangle = \frac{1 - ER}{\langle DT \rangle + T_0 + D_{corr} + ER \cdot D_p} \quad (12)$$

582

MEAN TOTAL CORRECT TRIALS is a model-free measure of the reward attained by the animals within a given window of trials. Every correct response yields an identical water reward, hence, reward can be counted by counting correct responses across trials. For one subject  $a \in [1, 2, 3, \dots, k]$ , total correct trials at trial  $n$  are the sum of correct trials up to trial  $n$ :

583

584

585

$$c_n^a = \sum_{\text{trial } i=1}^{\text{trial } n} o_i^a \quad (13)$$

586

where  $o_i^a$  is an element in a vector  $o^a$  containing the outcomes of those trials  $o^a = [o_1^a, o_2^a, o_3^a, \dots, o_n^a]$ . For correct and error responses  $o_n^a = 1$  and  $0$  respectively (e.g.  $o_n^a = [0, 0, 1, 1, 0, \dots, 1]$ ).

588

Mean total correct trials up to trial  $n$  is calculated by taking the average of total correct trials across all animals  $k$  up to trial  $n$ .

589

$$\langle c_n \rangle = \frac{1}{k} \sum_{\text{trial } i=1}^{\text{trial } n} c_i^1 + c_i^2 + c_i^3 + \dots + c_i^k \quad (14)$$

590

MEAN CUMULATIVE REWARD is a measure of the reward attained by the animals within a given window of trials. To calculate this quantity, a moving average of RT and accuracy for a given window size are first calculated for every animal individually. To avoid averaging artifacts, only values a full window length from the beginning are considered. Given these moving averages, RR is then calculated for every animal and subsequently averaged across animals to get a moving average of mean reward rate. To calculate the mean cumulative reward, a numerical integral over a particular task time, such as *task engagement time* (see MEASURING TASK TIME) is then calculated using the composite trapezoidal rule.

591

592

593

594

595

596

597

SIGNAL-TO-NOISE RATIO (SNR) is a measure of an agent's perceptual ability in a discrimination task. Given an animal's particular ER and  $\langle DT \rangle$ , we use a standard drift-diffusion model equation to infer its SNR  $\bar{A}$ :

598

599

$$\bar{A}_{infer} = \frac{1 - 2ER}{2\langle DT \rangle} \log \frac{1 - ER}{ER} \quad (15)$$

600

The SNR equation defines a U-shaped curve that increases as ERs move away from 0.5. For cases early in learning where ERs were below 0.5 because of potential initial biases, we assumed the inferred SNR was negative (meaning the animals had to unlearn the biases in order to learn, and thus had a monotonically increasing SNR during learning).

601

602

603

604

SNR PERFORMANCE FRONTIER is a measure of an agent's possible error rate and reaction time combinations based on their current perceptual ability. Because of the speed-accuracy trade-off, not all combinations of ER and  $\langle DT \rangle$  are possible. Instead, performance is bounded by an agent's SNR  $\bar{A}$  at any point in time, and their particular (ER,  $\langle DT \rangle$ ) combination will depend on their choice of threshold.

605

606

607

608

Given a fixed  $D_{tot}$  (as in the case of our experiment), this bound exists in the form of a performance frontier—the combination of all resultant ERs and mean normalized DTs possible given a fixed SNR  $\bar{A}$  and all possible thresholds  $\bar{z}$ .

609

610

611

Given an animal's particular ER and  $\langle DT \rangle$ , we use a standard drift-diffusion model equation to infer its SNR  $\bar{A}$ :

612

$$\bar{A}_{infer} = \frac{1 - 2ER}{2\langle DT \rangle} \log \frac{1 - ER}{ER} \quad (16)$$

613

We can then use that  $\bar{A}_{infer}$  to calculate its performance frontier for a range of thresholds  $\bar{z} \in [0, \infty)$  with standard equations from the drift-diffusion model:

614

$$ER_{\bar{A}_{infer}} = \frac{1}{1 + e^{2\bar{z}\bar{A}_{infer}}} \quad (17)$$

$$DT_{\bar{A}_{infer}} = \bar{z} \tanh(\bar{z}\bar{A}_{infer}) \quad (18)$$

$$(19)$$

615 For every performance frontier there will be one unique  $(ER_{\bar{A}_{infer}}, DT_{\bar{A}_{infer}})$  combination for which  
616 reward rate will be greatest, and it will lie on the OPC.

617 FRACTION MAXIMUM INSTANTANEOUS REWARD RATE is a measure of distance to the optimal perfor-  
618 mance curve, *i.e.* optimal performance. Given an animal's ER and  $\langle DT \rangle$ , we inferred their SNR and  
619 calculated their performance frontier as described above. We then divided the animal's reward rate by  
620 the maximum reward rate on their performance frontier, corresponding to the point on the OPC they  
621 could have attained given their inferred SNR  $A_{infer}$ :

$$fraction\ max\ RR = \frac{RR_{ER, \langle DT \rangle}}{max\ RR_{\bar{A}_{infer}}} \quad (20)$$

622 MAXIMUM INSTANTANEOUS REWARD RATE OPPORTUNITY COST, like Fraction Maximum Reward Rate,  
623 is also measure of distance to the optimal performance curve, *i.e.* optimal performance, but it emphasizes  
624 the reward rate fraction given up by the subject given its current ER and  $\langle DT \rangle$  combination along its  
625 SNR performance frontier. It is simply:

$$max\ RR\ opportunity\ cost = 1 - fraction\ max\ RR \quad (21)$$

626 MEAN POST-ERROR SLOWING is a metric to account for the potential policy of learning by slowing down  
627 after error trials. In order to quantify the amount of post-error slowing in a particular subject, the  
628 subject's reaction times for in a session are segregated into correct trials following an error, and correct  
629 trials following a correct choice, and separately averaged. The difference between these indicates the  
630 degree of post-error slowing present in that subject during that session.

$$post\text{-}error\ slowing\ (PES) = \langle RT_{post\text{-}error\ correct\ trials} \rangle - \langle RT_{post\text{-}correct\ correct\ trials} \rangle \quad (22)$$

631  
632  
633

The mean post-error slowing for one session is thus the mean of this quantity across all subjects  $k$ .

$$\langle PES \rangle = \frac{PES^1 + PES^2 + PES^3 + \dots + PES^k}{k} \quad (23)$$

## 634 Computing Error

635 WITHIN-SUBJECT SESSION ERRORS (*e.g.* Fig. 1d) for accuracy and reaction times were calculated by  
636 bootstrapping trial outcomes and reaction times for each session. We calculated a bootstrapped standard  
637 error of the mean by taking the standard deviation of the distribution of means from the bootstrapped  
638 samples. A 95% confidence interval can be calculated from the distribution of means as well.

639 ACROSS-SUBJECT SESSION ERRORS (*e.g.* Fig. 5d) were computed by calculating the standard error of the  
640 mean of individual animal session means.

641 ACROSS-SUBJECT SLIDING WINDOW ERRORS (*e.g.* Fig. 5b; Fig. 6b) were calculated by averaging trials  
642 over a sliding window (*e.g.* 200 trials) for each animal first, then taking the standard error of the  
643 mean of each step across animals. Alternatively, the average could be taken across a quantile (*e.g.* first  
644 decile, second decile, etc.), and then the standard error of the mean of each quantile across animals was  
645 computed.

## 646 Measuring Task Time

647 TRIALS are the smallest unit of behavioral measure in the task and are defined by one stimulus presen-  
648 tation accompanied by one outcome (correct, error) and one reaction time.

649 SESSIONS are composed of as many trials as an animal chooses to complete within a set window of wall  
650 clock time, typically around 2 hours once daily. An error rate (fraction of error trials over total trials for  
651 the session) and a mean reaction time can be calculated for a session.

652 NORMALIZED SESSIONS are a group of sessions (*e.g.* 1, 2, 3, ..., 10) where a particular session's normalized  
653 index corresponds to its index divided by the total number of sessions in the group (*e.g.* 0.1, 0.2, 0.3, ...,

654 1.0). Because animals may take different numbers of sessions in order to learn to criterion, for instance,  
655 a normalized index for sessions allows better comparison of psychophysical measurements throughout  
656 learning.

657 STIMULUS VIEWING TIME measures the time that the animals are viewing the stimulus, defined as the  
658 sum of all reaction times up to trial  $n$  as:

$$\text{stimulus viewing time} = \sum_{\text{trial } i=1}^{\text{trial } n} RT_i \quad (24)$$

659 TASK ENGAGEMENT TIME measures the time relevant for reward rate. We define task engagement time  
660 as the sum of reaction times plus all mandatory task time, essentially the cumulative sum of the average  
661 task time used to calculate reward rate:

$$\text{task engagement time} = \sum_{\text{trial } i=1}^{\text{trial } n} RT_i + n_{\text{corr}} D_{\text{corr}} + n_{\text{err}} D_{\text{err}} \quad (25)$$

662 the sum of reaction times up to trial  $n$  plus the sum of  $D_{\text{err}} = 3136$  ms and  $D_{\text{corr}} = 6370$  ms, the  
663 mandatory post-error and post-correct response-to-stimulus intervals, proportional to the number of error  
664 and correct trials ( $n = n_{\text{corr}} + n_{\text{err}}$ ).

## 665 Statistical Analyses

666 FIGURE 1d: We wished to test whether the mean fraction maximum reward rate of our subjects over  
667 the ten sessions after having completed training were significantly different from optimal performance.  
668 A Shapiro-Wilk test failed to reject ( $p < 0.05$ ) a null hypothesis for normality for 18/26 subjects, with  
669 the following p-values (from left to right): (0.8162, 0.1580, 0.3746, 0.6985, 0.0025, 0.0467, 0.0040, 0.6522,  
670 0.0109, 0.1625, 1.8178e-05, 0.0901, 0.7606, 0.0295, 0.0009, 0.2483, 0.5627, 0.0050, 0.4464, 0.6839, 0.5953,  
671 0.0140, 0.1820, 0.1747, 0.6385, 0.2304). Thus, we conducted a one-sided Wilcoxon signed-rank test on  
672 our sample against 0.99, testing for the evidence that each subject's mean fraction max reward rate was  
673 greater than 99% of the maximum ( $p < 0.05$ ), and obtained the following p-values (from left to right):  
674 (0.0025, 0.0025, 0.0025, 0.1013, 0.2223, 0.0063, 0.0047, 0.0025, 0.0025, 0.0025, 0.0025, 0.0571, 0.6768,  
675 0.0047, 0.7125, 0.0372, 0.8794, 0.4797, 0.7125, 0.8987, 0.0372, 0.0109, 0.9975, 0.9766, 0.9917, 0.9975).

676 FIGURE 4b: We wished to test the difference in mean RT between two randomly chosen groups of animals  
677 before and after a RT restriction to assess the effectiveness of the restriction. A Shapiro-Wilk test did not  
678 support an assumption of normality for the 'below' group in either condition resulting in the following  
679 (W statistic, p-value) for the pre-RT restriction 'above' and 'below' groups and post-RT restriction  
680 'above' and 'below' groups: (0.9073, 0.3777), (0.6806, 0.0059), (0.8976, 0.3168), (0.6583, 0.0033). Hence,  
681 we conducted a Wilcoxon rank-sum test for the pre- and post-RT restriction groups and found the  
682 pre-RT restriction group was not significant ( $p = 0.570$ ) while the post-RT restriction group was ( $p =$   
683  $0.007$ ), indicating the two groups were not significantly different before the RT restriction, but became  
684 significantly different after the restriction.

685 FIGURE 4d: We wished to test the difference in accuracy between the 'above' and 'below' groups for every  
686 session of stimulus pair 3. A Shapiro-Wilk Test failed to reject the assumption of normality ( $p < 0.05$ )  
687 for any session from either condition (except session 4, 'above', which could be expected given there were  
688 16 tests), with the following (W statistic, p-value) for [session: 'above', 'below'] by session: [1: (0.9340,  
689 0.6240), (0.8959, 0.3068)], [2: (0.9381, 0.6522), (0.8460, 0.1130)], [3: (0.9631, 0.8291), (0.9058, 0.3676)], [4:  
690 (0.7608, 0.0374), (0.9728, 0.9177)], [5: (0.8921, 0.3680), (0.9779, 0.9486)], [6: (0.7813, 0.0565), (0.9702,  
691 0.9002)], [7: (0.8942, 0.3786), (0.9711, 0.9062)], [8: (0.7848, 0.0605), (0.9611, 0.8280)]

692 A Levene Test failed to reject the assumption of equal variances for every pair of sessions except the  
693 first (statistic, p-value): (6.3263, 0.0306), (2.2780, 0.1621), (1.2221, 0.2948), (0.8570, 0.3764), (2.7979,  
694 0.1253), (0.7364, 0.4109), (0.0871, 0.7739), (0.0088, 0.9269).

695 Hence, we performed a two-sample independent  $t$ -test for every session with the following p-values:  
696 (0.4014, 0.04064, 0.0057, 0.0038, 0.0011, 0.0038, 0.0006, 6.3658e-05).

697 We also wished to test the difference between the slopes of linear fits to the accuracy curves for  
698 both conditions. A Shapiro-Wilk Test failed to reject the assumption of normality ( $p < 0.05$ ) for either  
699 condition, with the following (W statistic, p-value) for 'above' and 'below': (0.8964, 0.3095), (0.8794,  
700 0.3065). A Levene Test failed to reject the assumption of equal variances ( $p < 0.05$ ) for each condition

701 (statistic, p-value): (0.2141, 0.6535). Hence, we performed a two-sample independent  $t$ -test and found a  
702 significant difference ( $p = 0.0027$ ).

703 FIGURE 5d, e: We wished to test whether the animals had significantly changed their session mean RTs  
704 with respect to their individual previous baseline RTs (paired samples). To do this, we conducted a  
705 permutation test for every session with the new visible stimuli (stimulus pair 2) or the transparent  
706 stimuli. For 1000 repetitions, we randomly assigned labels to the experimental or baseline RTs and  
707 then averaged the paired differences. The p-value for a particular session was the fraction of instances  
708 where the average permutation difference was more extreme than the actual experimental difference. For  
709 sessions with stimulus pair 2, the p-values from the permutation test were: (0.0034, 0.0069, 0.0165, 0.0071,  
710 0.0291, 0.0347, 0.06, 0.0946, 0.3948, 0.244, 0.244, 0.4497, 0.3437). For sessions with transparent stimuli  
711 (plus rats AK2, AK9, & AK10 from the near-transparent stimuli) the p-values from the permutation  
712 were (0.0859375, 0.44921875, 0.15625, 0.03125, 0.02734375, 0.015625, 0.26953125, 0.02734375, 0.03125,  
713 0.01953125, 0.0546875). To investigate whether the animals' significantly slowed down their mean RTs  
714 compared to baseline during the first session of transparent stimuli, we divided RTs in the first session  
715 in half and ran a permutation test on each half with the following p-values: (0.0390625, 0.2890625).

716 In order to test the correlation between the initial change in RT and the initial change in SNR for  
717 stimulus pair 2, we ran a standard linear regression on the average per subject for each of these variables  
718 for the first 2 sessions of stimulus pair 2. The  $R^2$  refers to the square of the correlation coefficient, and  
719 the p-value is from a Wald Test with  $t$ -distribution of the test statistic.

720 FIGURE S5a—h: Statistical significance of differences in means between start of learning and after learn-  
721 ing for stimulus pair 1 for the average predicted threshold distribution, and for the individual predicted  
722 thresholds were determined via a Wilcoxon signed-rank test. The p-values were: (a) average predicted  
723 threshold:  $<1e-4$ , (b) individuals predicted threshold: 0.0006, (c) average predicted drift rate:  $<1e-4$ ,  
724 (d) individuals predicted drift rate:  $<1e-4$ .

725 For stimulus pair 2 we also used a Wilcoxon signed-rank test, and performed three tests per condition:  
726 baseline stimulus pair 1 versus start learning, start learning versus after learning, and baseline stimulus  
727 pair 1 versus after learning. In this order, the p-values were: (a) average predicted threshold:  $<1e-4$ ,  
728  $<1e-4$ , 0.3016, (b) individuals predicted threshold: 0.0386, 0.0557, 0.8767, (c) average predicted drift  
729 rate:  $<1e-4$ ,  $<1e-4$ ,  $<1e-4$ , (d) individuals predicted drift rate: 0.0004, 0.0004, 0.1089.

730 FIGURE S7b, d: We tested for a difference in mean post-error slowing between the first 2 sessions and  
731 last 2 sessions of training for each animal for stimulus pair 1 (b) or the last 2 sessions of stimulus pair  
732 1 and the first 2 sessions of stimulus pair 2 (d) via a Wilcoxon-signed rank test. The p-values were (b)  
733 0.585 and (d) 0.255.

734 FIGURE S8d—i: Statistical significance of differences in means between the two training regimes for a  
735 variety of psychophysical measures was determined by a Wilcoxon rank-sum test with  $p \leq 0.05$ . The  
736 p-values were: (d) accuracy: 0.21, (e) reaction time: 0.81, (f) fraction max iRR: 0.22, (g) total trial  
737 number: 0.46, (h): voluntary iti after error: 0.75, (i) fraction trials ignored: 0.03.

738 FIGURE S9a, b: We tested for a difference in the aggregate reaction time distributions of a transparent  
739 stimuli condition ( $n = 5$  subjects), and a no minimum reaction time condition with known stimuli ( $n =$   
740 5 subjects) via a 2-sample Kolmogorov-Smirnov Test and found a p-value of  $<1e-10$ .

741 We tested for the difference in the first decile of vincentized reaction times between these two condi-  
742 tions via a Wilcoxon rank-sum test and found a p-value of 0.047.

## 743 Evaluation of Optimality

744 Under the assumptions of a simple drift-diffusion process, the optimal performance curve (OPC) defines  
745 a set of optimal threshold-to-drift ratios with corresponding decision times and error rates for which an  
746 agent maximizes instantaneous reward rate [10]. Decision times are scaled by the particular task timing as  
747 mean normalized decision time:  $\langle DT \rangle / D_{tot}$ . The OPC is parameter free and can thus be used to compare  
748 performance across tasks, conditions, and individuals. An optimal agent will lie on different points on the  
749 OPC depending on differences in task timing ( $D_{tot}$ ) and stimulus difficulty (SNR). Assuming constant  
750 task timing, the SNR will determine different positions along the OPC for an optimal agent. For  $\langle DT \rangle$

751  $> 0$  and  $0 < ER < 0.5$ , the OPC is defined as:

$$\frac{\langle DT \rangle}{D_{tot}} = \left[ \frac{1}{ER \log \frac{1-ER}{ER}} - \frac{1}{1-2ER} \right]^{-1} \quad (26)$$

752 and exists in **speed-accuracy space**, defined by  $\langle DT \rangle / D_{tot}$  and  $ER$ . Given estimates for  $T_0$  and  $D_{RSI}$ , the  $ER$  and  $\langle DT \rangle$  for any given animal can be compared to the optimal values defined by the OPC in speed-accuracy space.

753  
754  
755 Moreover, because  $ER$  should decrease with learning, learning trajectories for different subjects and models can also be compared to the OPC and to each other in speed-accuracy space.

### 757 Mean Normalized Decision Time Depends Only on $T_0$ and $D_{err}$

758 To determine what times the normalizing term  $D_{tot}$  includes, we re-derive the OPC from average reward rate. According to Gold & Shadlen [9], average reward rate is defined as:

$$RR = \frac{\text{average accuracy}}{\text{average time per trial}} \quad (27)$$

760 The average time per trial is composed of the average decision time, non-decision-time, the post-error time scaled by number of errors, and the post-correct time scaled by the number of correct choices:

$$\text{average time per trial} = \langle DT \rangle + T_0 + (1 - ER)D_{corr} + ER \cdot D_{err} \quad (28)$$

762 Define the extra penalty time  $D_p = D_{err} - D_{corr}$ . We can write the average reward rate as equation A26 from [10],

$$RR = \frac{1 - ER}{\langle DT \rangle + T_0 + D_{corr} + ER \cdot D_p} \quad (29)$$

764 Optimal behavior is defined as maximizing reward rate with respect to the thresholds in the drift-diffusion model. We thus re-write  $ER$  and  $DT$  in terms of average threshold and average SNR,

$$RR = \frac{1 - \frac{1}{1+e^{2\bar{z}\bar{A}}}}{\bar{z} \tanh(\bar{z}\bar{A}) + T_0 + D_{corr} + \frac{1}{1+e^{2\bar{z}\bar{A}}} \cdot D_p} \quad (30)$$

$$= \frac{1}{\bar{z} + D_{corr} + T_0 + (D_{corr} + T_0 + D_p - \bar{z}) \cdot e^{-2\bar{z}\bar{A}}} \quad (31)$$

766 Next to find the extremum, we take the derivative of  $RR$  with respect to the threshold and set it to zero,

$$\frac{\partial RR}{\partial \bar{z}} = -\frac{1 + (-1 - 2\bar{A}(D_{corr} + T_0 + D_p - \bar{z})) \cdot e^{-2\bar{z}\bar{A}}}{(\bar{z} + D_{corr} + T_0 + (D_{corr} + T_0 + D_p - \bar{z}) \cdot e^{-2\bar{z}\bar{A}})^2} \quad (32)$$

$$0 = 1 - [1 + 2\bar{A}(T_0 + D_{err} - \bar{z})] e^{-2\bar{z}\bar{A}} \quad (33)$$

$$= \frac{1 - 2ER}{ER} - \frac{T_0 + D_{err}}{DT} (1 - 2ER) \log \frac{1 - ER}{ER} - \log \frac{1 - ER}{ER} \quad (34)$$

768 where in the final step we have rewritten  $\bar{z}$  and  $\bar{A}$  in terms of  $ER$  and  $\langle DT \rangle$ .

769 Rearranging to place  $DT$  on the left hand side reveals an OPC where decision time is normalized by the post-error response-to-stimulus time  $D_{err}$ :

$$\frac{\langle DT \rangle}{T_0 + D_{err}} = \left[ \frac{1}{ER \log \frac{1-ER}{ER}} - \frac{1}{1-2ER} \right]^{-1} \quad (35)$$

771 Notably, the post-correct response-to-stimulus time  $D_{corr}$  is not part of the normalization. Intuitively, this is because post-correct delays are an unavoidable part of accruing reward and therefore do not influence the optimal policy.

## 774 Estimating $T_0$

775  $T_0$  is defined as the non-decision time component of a reaction time, comprising motor and perceptual  
776 processing time [31]. It can be estimated by fitting a drift-diffusion model to the psychophysical data.  
777 Because of the experimentally imposed minimum reaction time meant to ensure visual processing of the  
778 stimuli, however, our reaction time distributions were truncated at 350 ms, meaning a drift-diffusion  
779 model fit estimate of  $T_0$  is likely to be an overestimate. To address this issue, we set out to determine  
780 possible boundaries for  $T_0$  and estimated it in a few ways, all of which did indeed fall between those  
781 boundaries (Fig. S10e).

782 We found that after training, in the interval between 350-375 ms, nearly all of our animals had  
783 accuracy measurements above chance (Fig. S10b), meaning that the minimum reaction time of 350 ms  
784 served as an upper bound to possible  $T_0$  values.

785 To determine a lower bound, we obtained measurements for the two components comprising  $T_0$ : motor  
786 and initial perceptual processing times. To measure the minimum motor time required to complete a  
787 trial, we analyzed licking times across the different lickports. The latency from the last lick in the central  
788 port to the first lick in one of the two side ports peaked at around 80 ms (Fig. S10c). In addition, the  
789 latency from one lick to the next lick at the same port at any of the lickports was also around 80 ms  
790 (data not shown). Thus, the minimum motor time was determined by the limit on licking frequency,  
791 and not on a movement of the head redirecting the animal from the central port to one of the side ports.  
792 To measure the initial perceptual processing times, we looked to published latencies of visual stimuli  
793 traveling to higher visual areas in the rat. Published latencies reaching area TO (predicted to be after  
794 V1, LM and LI in the putative ventral stream in the rat) were around 80 ms (Fig. S10d) [112]. Based  
795 on these measurements, we estimated a  $T_0$  lower bound of approximately 160 ms.

796 One worry is that our lower bound could potentially be too low, as it is only estimated indirectly.  
797 Recent work on the speed-accuracy trade-off in a low-level visual discrimination tasks in rats found that  
798 accuracy was highest at a reaction time of 218 ms [28]. However, accuracy was still above chance for  
799 reaction times binned between 130–180 ms. In this task, reaction time was measured when an infrared  
800 beam was broken, which means we can assume there was no motor processing time. This leaves decision  
801 time, and initial perceptual processing time (part of  $T_0$ ) within the 130-180 ms duration. The complexity  
802 of solving a high-level visual task like ours and a low-level one will result in substantial differences in  
803 decision time, but should not in principle affect non-decision time. Considering a latency estimate of 80  
804 ms based on physiological evidence [112] can account for the initial perceptual processing component of  
805  $T_0$  and gives an estimate  $T_0 = 80$  ms for this study.

806 Because a reaction time around  $T_0$  should not allow for any decision time, accuracy should be around  
807 50%. To estimate  $T_0$  based on this observation, we extrapolated the time at which accuracy would drop  
808 to 50% after plotting accuracy as a function of reaction time (Fig. S10a) and found values of 165 and  
809 225 ms for linear and quadratic extrapolations respectively. Finally, we fit our behavioral data with a  
810 hierarchical drift-diffusion model [107] and found a  $T_0$  estimate of  $295 \pm 4$  ms (despite there being no  
811 data below 350 ms). To address this issue, we fit drift-diffusion model to a small number of behavioral  
812 sessions we conducted with animals trained on the minimum reaction time of 350 ms but where that  
813 constraint was eliminated and found a  $T_0$  estimate of  $265 \pm 120$  (SD) ms. We stress that because the  
814 animals were trained with a minimum reaction time, they likely would have required extensive training  
815 without that constraint to fully make use of the time below the minimum reaction time, thus this estimate  
816 is likely to also be an overestimate. We do note however that the estimate is lower than the estimate  
817 with an enforced minimum reaction time and has a much higher standard deviation (spanning our lower  
818 and upper bound estimates).

819 Despite the range of possible  $T_0$  values, we find that our qualitative findings (in terms of learning  
820 trajectory and near-optimality after learning) do not change (Fig. S10f, g), and proceed with a  $T_0 =$   
821 160 ms for the main text.

## 822 Determining $D_{\text{err}}$ and $D_{\text{corr}}$

823 The experimental protocol defines the mandatory post-error and post-correct response-to-stimulus times  
824 ( $D_{\text{err}}$  and  $D_{\text{corr}}$  respectively). However, these times may not be accurate because of delays in the software  
825 communicating with different components such as the syringe pumps, and other delays such as screen  
826 refresh rates. We thus determined the actual mandatory post-error and post-correct response-to-stimulus  
827 times by measuring them based on timestamps on experimental file logs and found that  $D_{\text{err}} = 3136$  ms,  
828 and  $D_{\text{corr}} = 6370$  ms (Fig. S11).

## 829 Determining $D_{RSI}$

830 Mean normalized decision time, as described above, is calculated by dividing the mean decision time  
831  $\langle DT \rangle$  by  $D_{tot}$ , equal to  $T_0 + D_{RSI}$ , the response-to-stimulus interval [31]. The response-to-stimulus  
832 interval comprises two components, the mandatory response-to-stimulus interval (punishment or reward  
833 time, times for auditory cues, mandatory intertrial interval, etc.) (Fig. S11), and any extra voluntary  
834 intertrial interval (Fig. S12):

$$\text{response-to-stimulus interval} = \text{mandatory interval} + \text{voluntary interval} \quad (36)$$

835 We assume that the animals optimize reward rate based on task engagement time, the sum of reaction  
836 times plus all mandatory task time, exiting the task during any extra voluntary inter-trial intervals. Thus,  
837 for the purposes of mean normalized decision time:

$$\text{response-to-stimulus interval} = \text{mandatory interval} \quad (37)$$

838 A derivation concluded that the response-to-stimulus interval after an error trial was the only relevant  
839 interval (*see* MEAN NORMALIZED DECISION TIME DEPENDS ONLY ON  $T_0$  AND  $D_{ERR}$  for derivation), thus:

$$D_{RSI} = D_{err} = \text{mandatory post-error response-to-stimulus interval} \quad (38)$$

## 840 Voluntary Intertrial Interval

841 We conducted a detailed analysis of the voluntary intertrial intervals after both correct and error trials  
842 (Fig. S12). To prevent a new trial from initiating while the animals were licking one of the side lickports,  
843 the task included a 300 ms interval at the end of a trial where an extra 500 ms were added if the animal  
844 licked one of the side lickports (Fig. S11). There was no stimulus (visual or auditory) to indicate the  
845 presence of this task feature so the animals were not expected to learn it. It was clear that the animals  
846 did not learn this task feature as most voluntary intertrial intervals are clustered in 500 ms intervals  
847 and decay after each boundary (Fig. S12a). Aligning the voluntary intertrial distributions every 500 ms  
848 reveals substantial overlap (Fig. S12c, d), indicating similar urgency in every 500 ms interval, with an  
849 added amount of variance the farther the interval from zero. Moreover, measuring the median voluntary  
850 inter-trial interval from 0-500, 0-1000 and 0-2000 ms showed very similar values (47, 67, 108 ms after  
851 error trials, Fig. S12b). The median was higher after correct trials (55, 134, 512 ms, Fig. S12b) because  
852 the animals were collecting reward from the side lickports and much more likely to trigger the extra 500  
853 ms penalty times.

## 854 Reward Rate Sensitivity to $T_0$ and Voluntary Intertrial Interval

855 To ensure that our results did not depend on our chosen estimate for  $T_0$  and our choice to ignore  
856 voluntary intertrial intervals when computing metrics like  $D_{RSI}$  and reward rate, we computed fraction  
857 maximum instantaneous reward rate as a function of  $T_0$  and voluntary intertrial interval. We conducted  
858 this analysis across  $n = 26$  rats at asymptotic performance (Fig. S13a, b), and during the learning  
859 period (Fig. S13c, d). During asymptotic performance, sweeping  $T_0$  from our estimated minimum to  
860 our maximum possible values generated negligible changes in reward rate across a much larger range of  
861 possible voluntary intertrial intervals than we observed (Fig. S13a). Reward rate was more sensitive to  
862 voluntary intertrial intervals, but did not drop below 90% of the possible maximum when considering a  
863 median voluntary intertrial interval up to 2000 ms (the median when allowing up to a 2000 ms window  
864 after a trial, after which agents are considered to have “exited the task”) (Fig. S13b). During learning, we  
865 found similar results, with possible voluntary intertrial interval values have a larger effect on reward rate  
866 than  $T_0$ , however even with the most extreme combination of a maximum  $T_0 = 350$  ms, and the median  
867 voluntary intertrial interval up to 2000ms (Fig. S13d, light grey trace), fraction maximum reward rate  
868 was at most 10-15% away from the least extreme combination of  $T_0 = 350$  ms and voluntary intertrial  
869 interval = 0 (Fig. S13c, horizontal line along the bottom of the heat map) for most of the learning  
870 period. These results confirm that our qualitative findings do not depend on our estimated values of  $T_0$   
871 and choice to ignore voluntary intertrial intervals.

## 872 Ignore Trials

873 Because of the free-response nature of the task, animals were permitted to ignore trials after having  
874 initiated them (Fig. S2). Although the fraction of ignored trials did seem to be higher at the beginning

875 of learning for the first set of stimuli the animals learned (stimulus pair 1; Fig. S2a), this effect did not  
876 repeat for the second set (stimulus pair 2, Fig. S2b). This suggests that the cause for ignoring the trials  
877 during learning was not stimulus-based but rather related to learning the task for the first time. Overall,  
878 the mean fraction of ignored trials remained consistently low across stimulus sets and ignore trials were  
879 excluded from our analyses.

## 880 Post-Error Slowing

881 In order to verify whether the increase in reaction time we saw at the beginning of learning relative to  
882 the end of learning was not solely attributable to a post-error slowing policy, we quantified the amount  
883 of post-error slowing during learning for both stimulus pair 1 and stimulus pair 2. For stimulus pair 1,  
884 we found that there was a consistent but slight amount of average post-error slowing. (Fig. S7a). This  
885 amount was not significantly different at the start and end of learning (Fig. S7b).

886 We re-did this analysis for stimulus pair 2 and found similar results: animals had a consistent, modest  
887 amount of post-error slowing but it did not change across sessions during learning (Fig. S7c). We tested  
888 for a significant difference in post-error slowing between the last 2 sessions of stimulus pair 1 and the  
889 first 2 sessions of the completely new stimulus pair 2 and found none (Fig. S7d) even though there  
890 was a large immediate change in error rate. In fact, there was a trend towards a decrease in post-error  
891 slowing (and towards post-correct slowing) in the first few sessions of stimulus pair 2. This is consistent  
892 with the hypothesis that post-error slowing is an instance of a more general policy of orienting towards  
893 infrequent events [54]. As correct trials became more infrequent than error trials when stimulus pair 2  
894 was presented, we observed a trend towards post-correct slowing, as predicted by this interpretation.

895 Our subjects exhibit a modest, consistent amount of post-error slowing, which could at least partially  
896 explain the reaction time differences we see throughout learning. An experiment with transparent stimuli  
897 where error rate was constant but reaction times dropped, however, strongly contradicts the account  
898 that the rats implement a simple strategy like post-error slowing to modulate their reaction times during  
899 learning.

## 900 Recurrent Neural Network Model and Learning DDM (LDDM) Reduc- 901 tion

902 We consider a recurrent network receiving noisy visual inputs over time. In particular, we imagine that  
903 an input layer projects through weighted connections to a single recurrently connected read-out node,  
904 and that the weights must be tuned to extract relevant signals in the input. The read-out node activity is  
905 compared to a modifiable threshold which governs when a decision terminates. This network model can  
906 then be trained via error-corrective gradient descent learning or some other procedure. In the following  
907 we derive the average dynamics of learning.

908 To reduce this network to a drift-diffusion model with time-dependent SNR, we first note that due  
909 to the law of large numbers, activity increments of the read-out node will be Gaussian provided that the  
910 distribution of input stimuli has bounded moments. We can thus model the input-to-readout pathway at  
911 each time step as a Gaussian input  $x(t)$  flowing through a scalar weight  $u$ , with noise of variance  $c_o^2$  added  
912 before the signal is sent into an integrating network. Taking the continuum limit, this yields a drift-  
913 diffusion process with effective drift rate  $\bar{A} = Au$  and noise variance  $\bar{c}^2 = u^2c_i^2 + c_o^2$ . Here  $A$  parameterizes  
914 the perceptual signal,  $c_i^2$  is the input noise variance (noise in input channels that cannot be rejected),  
915 and  $c_o^2$  is the output noise variance (internal noise in output circuitry). The resulting decision variable  
916  $\hat{y}$  at time  $T$  is Gaussian distributed as  $N(AuTy, u^2c_i^2T + c_o^2T)$  where  $y$  is the correct binary choice. A  
917 decision is made when  $\hat{y}$  hits a threshold of  $\pm z$ .

## 918 Within-trial Drift-diffusion Dynamics

919 On every trial, therefore, the subject's behavior is described by a drift-diffusion process, for which the  
920 average reward rate as a function of signal to noise and threshold parameters is known [10]. The accuracy  
921 and decision time of this scheme is determined by two quantities. First, the signal-to-noise ratio

$$\bar{A} = \left( \frac{\bar{A}}{\bar{c}} \right)^2 = \frac{A^2 u^2}{u^2 c_i^2 + c_o^2}, \quad (39)$$



922 and second, the threshold-to-drift ratio  $\bar{z} = z/\bar{A} = \frac{z}{Au(t)}$ . We can rewrite the signal-to-noise ratio as

$$\bar{A}(t) = \frac{A^2 u(t)^2}{c_i^2 u(t)^2 + c_o^2} = \frac{A^2}{c_i^2 + c_o^2/u(t)^2}. \quad (40)$$

923 From this it is clear that, when learning has managed to amplify the input signals such that  $u(t) \rightarrow \infty$ ,  
924 the asymptotic signal-to-noise ratio is simply  $\bar{A}^* = A^2/c_i^2$ . Further, rearranging to

$$\bar{A}(t) = \frac{\bar{A}^*}{1 + (c_o^2/c_i^2)/u(t)^2} \quad (41)$$

925 shows that there are in fact just two parameters: the asymptotic achievable SNR  $\bar{A}^*$  and the output- to  
926 input-noise variance ratio  $c \equiv c_o^2/c_i^2$ ,

$$\bar{A}(t) = \frac{\bar{A}^*}{1 + c/u(t)^2}. \quad (42)$$

927 The mean error rate (ER), mean decision time (DT), and mean reward rate (RR) are therefore

$$ER = \frac{1}{1 + e^{2\bar{z}\bar{A}}} \quad (43)$$

$$DT = \bar{z} \tanh(\bar{z}\bar{A}) \quad (44)$$

$$RR = \frac{1 - ER}{DT + D + T_0 + D_p \cdot ER} \quad (45)$$

928 where we have suppressed the dependence of  $\bar{A}$  and  $\bar{z}$  on time for clarity. Here  $D$  is the interval between  
929 a correct response and the next trial,  $T_0$  is the time required for non-decision making processing (e.g.,  
930 motor responses or initial sensory delays), and  $D_p$  is extra penalty time added to error responses.

931 The term  $\bar{z}\bar{A}$  is a measure of the total evidence accrued on average, and is equal to

$$\bar{z}\bar{A} = \frac{z}{Au(t)} \frac{\bar{A}^*}{1 + c/u(t)^2} \quad (46)$$

$$= \frac{z\bar{A}^*/A}{u(t) + c/u(t)}. \quad (47)$$

932 Here for a fixed threshold  $z$ , the denominator shows the trade-off for increasing perceptual sensitivity:  
933 small  $u(t)$  causes errors due to output noise, while large  $u(t)$  causes errors due to overly fast integration  
934 for the specified threshold level.

### 935 **Across-trial Error-Corrective Learning Dynamics**

936 To model learning, we consider that animals adjust perceptual sensitivities  $u$  over time in service of  
937 minimizing an objective function. In this section we derive the average learning dynamics when the  
938 objective is to minimize the error rate. The Learning DDM (LDDM) can be conceptualized as an “outer-  
939 loop” that modifies the SNR of a standard DDM “inner-loop” described in the preceding subsection. If  
940 perceptual learning is slow, there is a strong separation of timescales between these two loops. On the  
941 timescale of a single trial, the agent’s SNR is approximately constant and evidence accumulation follows  
942 a standard DDM, whereas on the timescale of many trials, the specific outcome on any one trial has only  
943 a small effect on the network weights  $w$ , such that the learning-induced changes are driven by the *mean*  
944 ER and DT.

945 To derive the mean effect of error-corrective learning updates, we suppose that on each trial the  
946 network uses gradient descent on the hinge loss to update its parameters, corresponding to standard  
947 practice for supervised neural networks. The hinge loss is

$$\mathcal{L}(u, y) = \max(0, 1 - \hat{y}y), \quad (48)$$

948 yielding the gradient descent update

$$u[r + 1] \leftarrow u[r] - \lambda \frac{\partial \mathcal{L}(u[r], y)}{\partial u} \quad (49)$$

949 where  $\lambda$  is the learning rate and  $r$  is the trial number.

950 When the learning rate is small ( $\lambda \ll 1$ ), each trial changes the weights minimally and the overall  
 951 update is approximately given by the average continuous-time dynamics

$$\frac{du}{dr} = -\left\langle \lambda \frac{\partial \mathcal{L}(u, y)}{\partial u} \right\rangle \quad (50)$$

$$= -\lambda \left\langle \left\langle \frac{\partial \mathcal{L}(u, y)}{\partial u} \middle| \text{error} \right\rangle + \left\langle \frac{\partial \mathcal{L}(u, y)}{\partial u} \middle| \text{correct} \right\rangle \right\rangle \quad (51)$$

$$= -\lambda ER \left\langle \frac{\partial \mathcal{L}(u, y)}{\partial u} \middle| \text{error} \right\rangle \quad (52)$$

$$= \lambda ER \left\langle y \frac{\partial \hat{y}}{\partial u} \middle| \text{error} \right\rangle \quad (53)$$

952 where  $\langle \cdot \rangle$  denotes an average over the correct answer  $y$ , the inputs and the output noise. The first step  
 953 follows from iterated expectation. The second step follows from the fact that the probability of an error  
 954 is simply the error rate  $ER$ , and for correct trials, the derivative of the hinge loss is zero. Next,

$$\frac{\partial \hat{y}}{\partial u} = \frac{\partial}{\partial u} \left( \sum_{i=0}^T ux_i + \eta_i \right) \quad (54)$$

$$= \sum_{i=0}^T x_i \quad (55)$$

955 where  $T$  is the time step at which  $\hat{y}$  crosses the decision threshold  $\pm z$ . Returning to Eq. (53),

$$\lambda ER \left\langle y \frac{\partial \hat{y}}{\partial u} \middle| \text{error} \right\rangle = \lambda ER \left\langle y \sum_{i=1}^T x_i \middle| \text{error} \right\rangle. \quad (56)$$

956 Hence the magnitude of the update depends on the typical total sensory evidence given that an error is  
 957 made. To calculate this, let  $\bar{x}_t = \sum_{i=0}^t x_i$  be the total sensory evidence up to time  $t$ , and  $\bar{\eta}_t = \sum_{i=0}^t$  be  
 958 the total decision noise up to  $t$ . These are independent and normally distributed as

$$\bar{x}_t \sim N(yAt, c_i^2 t) \quad (57)$$

$$\bar{\eta}_t \sim N(0, c_o^2 t). \quad (58)$$

959 Therefore, we have

$$\left\langle y \sum_{i=1}^T x_i \middle| \text{error} \right\rangle = \left\langle y \bar{x}_T \middle| \text{error} \right\rangle \quad (59)$$

$$= \left\langle y \bar{x}_T \middle| u \bar{x}_T + \bar{\eta}_T = -yz \right\rangle \quad (60)$$

$$= \left\langle y \bar{x}_T \middle| u \bar{x}_T / y + \bar{\eta}_T / y = -z \right\rangle. \quad (61)$$

960 These variables are jointly Gaussian. Letting  $v_1 = y \bar{x}_T$  and  $v_2 = u \bar{x}_T / y + \bar{\eta}_T / y$ , the means  $\mu_1, \mu_2$ ,  
 961 variances  $\sigma_1^2, \sigma_2^2$ , and covariance  $\text{Cov}(v_1, v_2)$  of  $v_1, v_2$  given the hitting time  $T$  are

$$\mu_1 = ATdt \quad (62)$$

$$\mu_2 = uATdt \quad (63)$$

$$\sigma_1^2 = c_i^2 Tdt \quad (64)$$

$$\sigma_2^2 = u^2 c_i^2 Tdt + c_o^2 Tdt \quad (65)$$

$$\text{Cov}(y \bar{x}_T, u \bar{x}_T / y + \bar{\eta}_T / y) = \langle y \bar{x}_T (u \bar{x}_T / y + \bar{\eta}_T / y) \rangle - \langle y \bar{x}_T \rangle \langle u \bar{x}_T / y + \bar{\eta}_T / y \rangle \quad (66)$$

$$= u \langle \bar{x}_T^2 \rangle - u \langle \bar{x}_T \rangle^2 \quad (67)$$

$$= uc_i^2 Tdt. \quad (68)$$

962 The conditional expectation is therefore

$$\langle\langle v_1 | v_2 = -z, T \rangle\rangle_{T|\text{error}} = \left\langle \mu_1 + \frac{\text{Cov}(v_1, v_2)}{\sigma_2^2} (-z - \mu_2) \right\rangle_{T|\text{error}} \quad (69)$$

$$= \left\langle ATdt + \frac{uc_i^2}{u^2c_i^2 + c_o^2} (-z - uATdt) \right\rangle_{T|\text{error}} \quad (70)$$

$$= A(DT) - \frac{uc_i^2}{u^2c_i^2 + c_o^2} (z + uA(DT)) \quad (71)$$

963 where we have used the fact that  $\langle Tdt \rangle_{T|\text{error}} = DT$ , because in the DDM model the mean decision time  
 964 is the same for correct and error trials. Inserting Eq. (71) into Eq. (56) yields

$$\frac{d}{dr}u = \lambda ER \left( A(DT) + \frac{1}{1 + \frac{c_o^2}{u^2c_i^2}} (-z/u - A(DT)) \right) \quad (72)$$

$$= \lambda ER \left( A(DT) - \frac{1}{1 + c/u^2} (z/u + A(DT)) \right). \quad (73)$$

965 Finally, we switch the units of the time variable from trials to seconds using the relation  $dt = D_{tot}dr$ ,  
 966 yielding the dynamics

$$\tau \frac{d}{dt}u = ER \left( A \frac{DT}{D_{tot}} - \frac{1}{1 + c/u^2} \left[ \frac{z}{uD_{tot}} + A \frac{DT}{D_{tot}} \right] \right). \quad (74)$$

967 The above equation describes the dynamics of  $u$  under gradient descent learning. We note that here,  
 968 the dependence of the dynamics on threshold trajectory is contained implicitly in the  $DT$ ,  $ER$ , and  $D_{tot}$   
 969 terms.

970 To obtain equivalent dynamics for the SNR  $\bar{A}$ , we have

$$\tau \frac{d}{dt}\bar{A} = 2 \frac{A^2 c_o^2 u}{(c_i^2 + c_o^2/u(t)^2)^2} u(t)^{-3} \frac{d}{dt}u \quad (75)$$

$$= 2 \frac{c}{\bar{A}^*} \bar{A}^2 u^{-3} \frac{d}{dt}u. \quad (76)$$

971 Rearranging the definition of  $\bar{A}$  yields

$$u^2 = \frac{c\bar{A}}{\bar{A}^* - \bar{A}}. \quad (77)$$

972 Inserting Eq. (77) into Eq. 76 and simplifying, we have

$$\tau \frac{d}{dt}\bar{A} = 2\sqrt{\frac{\bar{A}(\bar{A}^*)}{c}} \left(1 - \frac{\bar{A}}{\bar{A}^*}\right)^{3/2} \frac{d}{dt}u \quad (78)$$

$$= 2\sqrt{\frac{\bar{A}(\bar{A}^*)}{c}} \left(1 - \frac{\bar{A}}{\bar{A}^*}\right)^{3/2} \frac{ER}{D_{tot}} \left( A(DT) - \frac{1}{1 + c/u^2} \left[ \frac{z}{u} + A(DT) \right] \right) \quad (79)$$

$$= 2A\sqrt{\frac{\bar{A}(\bar{A}^*)}{c}} \left(1 - \frac{\bar{A}}{\bar{A}^*}\right)^{5/2} \frac{ER}{D_{tot}} \left[ DT - \frac{\log(1/ER - 1)}{\bar{A}^* \left(1 - \frac{\bar{A}}{\bar{A}^*}\right)^2} \right]. \quad (80)$$

973 Here in the second step we have used the fact that  $\bar{A} = \frac{1-ER}{2(DT)} \log \frac{1-ER}{ER}$  and Eq. (77). Finally, absorbing  
 974 the drift rate  $A$  into the time constant  $\tau = \frac{1}{A\lambda}$ , we have the dynamics

$$\tilde{\tau} \frac{d}{dt}\bar{A} = 2\sqrt{\frac{\bar{A}(\bar{A}^*)}{c}} \left(1 - \frac{\bar{A}}{\bar{A}^*}\right)^{5/2} \frac{ER}{D_{tot}} \left[ DT - \frac{\log(1/ER - 1)}{\bar{A}^* \left(1 - \frac{\bar{A}}{\bar{A}^*}\right)^2} \right]. \quad (81)$$

975 This equation reveals that the Learning DDM has four scalar parameters: the asymptotic SNR  $\bar{A}^*$ ,  
 976 the output-to-input-noise variance ratio  $c$ , the initial SNR at time zero  $\bar{A}(0)$ , and the combined drift-  
 977 rate/learning rate time constant  $\tilde{\tau}$ . In addition, it requires the choice of threshold trajectory  $z(t)$ .

978 To reveal the basic learning speed/instantaneous reward rate trade-off in this model, we investigate  
 979 the limit where  $\bar{A}$  is small but finite (low signal-to-noise) and the threshold is small, such that the error  
 980 rate is near  $ER = 1/2$ . Then the second term in Eq. (81) goes to zero, giving

$$\tilde{\tau} \frac{d}{dt} \bar{A} \approx \sqrt{\frac{\bar{A}(\bar{A}^*)}{c}} \left(1 - \frac{\bar{A}}{\bar{A}^*}\right)^{5/2} \frac{DT}{D_{tot}} \quad (82)$$

$$\propto \frac{DT}{D_{tot}} \quad (83)$$

981 such that learning speed is increasing in  $DT$ . By contrast the instantaneous reward rate when  $ER = 1/2$   
 982 is

$$RR \approx \frac{1/2}{DT + D + T_0 + D_p/2}, \quad (84)$$

983 which is a decreasing function of  $DT$ .

## 984 Threshold Policies

985 We evaluate several simple threshold policies. The iRR-greedy policy sets  $\bar{z} = \bar{z}^*$ , the instantaneous re-  
 986 ward rate optimal policy at all times. The constant threshold policy sets  $\bar{z}$  to a fixed constant throughout  
 987 learning. The iRR-sensitive policy initializes the threshold to a fixed initial condition, and then moves  
 988 towards the iRR-optimal decision time using the dynamics

$$\frac{d}{dt} \bar{z} = \gamma \frac{DT^* - DT}{D_{tot}} \quad (85)$$

989 where  $\gamma$  controls the rate of convergence.

990 Finally, the global optimal policy optimizes the entire function  $\bar{z}(t)$  to maximize total cumulative  
 991 reward during exposure to the task. To compute the optimal threshold trajectory, we discretize the  
 992 reduction dynamics in Eq.(74) and perform gradient ascent on  $\bar{z}(t)$  using automatic differentiation in the  
 993 PyTorch python package. While this procedure is not guaranteed to find the global optimum (due to  
 994 potential nonconvexity of the optimization problem), in practice we found highly reliable results from a  
 995 range of initial conditions and believe that the identified threshold trajectory is near the global optimum.

## 996 Parameter Fitting

997 The LDDM model has several parameters governing its performance, including the asymptotic optimal  
 998 SNR, the output/input noise variance ratio, the learning rate, and parameters controlling threshold poli-  
 999 cies where applicable. To fit these, we discretized the reduction dynamics and performed gradient ascent  
 1000 on the log likelihood of the observed data under the LDDM model, again using automatic differentiation  
 1001 in the Pytorch python package. Because our model is highly simplified, our goal was only to place the  
 1002 parameters in a reasonable regime rather than obtain quantitative fits. We note that our fitting proce-  
 1003 dure could become stuck in local minima, and that a range of other parameter settings might also be  
 1004 consistent with the data. The best-fitting parameters we obtained and used in all model results were  
 1005  $A = 0.9542, c_i = 0.3216, c_o = 30, u_0 = .0001$ . We used a discretization timestep of  $dt = 160$ . For the  
 1006 constant threshold and iRR-sensitive policies, the best fitting initial threshold was  $z(0) = 30$ . For the  
 1007 iRR-sensitive policy, the best fitting decay rate was  $\gamma = 0.00011891$ .

## References

1. Woodworth, R. S. Accuracy of voluntary movement. *The Psychological Review: Monograph Supplements* **3**, i (1899).
2. Henmon, V. A. C. The relation of the time of a judgment to its accuracy. *Psychological review* **18**, 186 (1911).
3. Garrett, H. E. *A study of the relation of accuracy to speed* (Columbia University, 1922).
4. Pew, R. W. The speed-accuracy operating characteristic (1969).
5. Pachella, R. G. in (ed Kantowitz, B. H.) chap. The interpretation of reaction time in information processing research (Hillsdale, NJ: Erlbaum, 1974).
6. Wickelgren, W. A. Speed-accuracy tradeoff and information processing dynamics. *Acta psychologica* **41**, 67–85 (1977).
7. Ruthruff, E. A test of the deadline model for speed-accuracy tradeoffs. *Perception & Psychophysics* **58**, 56–64 (1996).
8. Ratcliff, R. & Rouder, J. N. Modeling Response Times for Two-Choice Decisions. *Psychological Science* **9**, 347–356 (1998).
9. Gold, J. I. & Shadlen, M. N. Banburismus and the brain: decoding the relationship between sensory stimuli, decisions, and reward. *Neuron* **36**, 299–308 (2002).
10. Bogacz, R., Brown, E., Moehlis, J., Holmes, P. & Cohen, J. D. The physics of optimal decision making: a formal analysis of models of performance in two-alternative forced-choice tasks. *Psychological Review* **113**, 700 (2006).
11. Bogacz, R., Hu, P. T., Holmes, P. J. & Cohen, J. D. Do humans produce the speed–accuracy trade-off that maximizes reward rate? *The Quarterly Journal of Experimental Psychology* **63**, 863–891 (2010).
12. Heitz, R. P. & Schall, J. D. Neural mechanisms of speed-accuracy tradeoff. *Neuron* **76**, 616–628 (2012).
13. Heitz, R. P. The speed-accuracy tradeoff: history, physiology, methodology, and behavior. *Frontiers in neuroscience* **8**, 150 (2014).
14. Rahnev, D. & Denison, R. N. Suboptimality in perceptual decision making. *Behavioral and Brain Sciences* **41** (2018).
15. Roitman, J. D. & Shadlen, M. N. Response of neurons in the lateral intraparietal area during a combined visual discrimination reaction time task. *Journal of Neuroscience* **22**, 9475–9489 (2002).
16. Simen, P., Cohen, J. D. & Holmes, P. Rapid decision threshold modulation by reward rate in a neural network. *Neural Networks* **19**, 1013–1026 (2006).
17. Balci, F. *et al.* Optimal temporal risk assessment. *Frontiers in Integrative Neuroscience* **5**, 56 (2011).
18. Balci, F. *et al.* Acquisition of decision making criteria: reward rate ultimately beats accuracy. *Attention, Perception, & Psychophysics* **73**, 640–657 (2011).
19. Starns, J. J. & Ratcliff, R. The effects of aging on the speed–accuracy compromise: Boundary optimality in the diffusion model. *Psychology and aging* **25**, 377 (2010).
20. Drugowitsch, J., DeAngelis, G. C., Klier, E. M., Angelaki, D. E. & Pouget, A. Optimal multisensory decision-making in a reaction-time task. *Elife* **3**, e03005 (2014).
21. Drugowitsch, J., DeAngelis, G. C., Angelaki, D. E. & Pouget, A. Tuning the speed-accuracy trade-off to maximize reward rate in multisensory decision-making. *Elife* **4**, e06678 (2015).
22. Manohar, S. G. *et al.* Reward pays the cost of noise reduction in motor and cognitive control. *Current Biology* **25**, 1707–1716 (2015).

- 1054 23. Uchida, N. & Mainen, Z. F. Speed and accuracy of olfactory discrimination in the rat.  
1055 *Nature neuroscience* **6**, 1224–1229 (2003).
- 1056 24. Abraham, N. M. *et al.* Maintaining accuracy at the expense of speed: stimulus similarity  
1057 defines odor discrimination time in mice. *Neuron* **44**, 865–876 (2004).
- 1058 25. Rinberg, D., Koulakov, A. & Gelperin, A. Speed-accuracy tradeoff in olfaction. *Neuron*  
1059 **51**, 351–358 (2006).
- 1060 26. Reinagel, P. Speed and accuracy of visual image discrimination by rats. *Frontiers in Neural*  
1061 *Circuits* **7**. ISSN: 1662-5110. <http://dx.doi.org/10.3389/fncir.2013.00200> (2013).
- 1062 27. Reinagel, P. Speed and Accuracy of Visual Motion Discrimination by Rats. *PLoS ONE* **8**  
1063 (ed Arabzadeh, E.) e68505. ISSN: 1932-6203. <http://dx.doi.org/10.1371/journal.pone.0068505> (June 2013).  
1064
- 1065 28. Kurylo, D., Lin, C. & Ergun, T. Visual discrimination accuracy across reaction time in  
1066 rats. *Animal Behavior and Cognition* **7**, 23–38 (2020).
- 1067 29. Simen, P. *et al.* Reward rate optimization in two-alternative decision making: empirical  
1068 tests of theoretical predictions. *Journal of Experimental Psychology: Human Perception*  
1069 *and Performance* **35**, 1865 (2009).
- 1070 30. Zacksenhouse, M., Bogacz, R. & Holmes, P. Robust versus optimal strategies for two-  
1071 alternative forced choice tasks. *Journal of Mathematical Psychology* **54**, 230–246 (2010).
- 1072 31. Holmes, P. & Cohen, J. D. Optimality and some of its discontents: Successes and short-  
1073 comings of existing models for binary decisions. *Topics in cognitive science* **6**, 258–278  
1074 (2014).
- 1075 32. Maddox, W. T. & Bohil, C. J. Base-rate and payoff effects in multidimensional perceptual  
1076 categorization. *Journal of Experimental Psychology: Learning, Memory, and Cognition* **24**,  
1077 1459 (1998).
- 1078 33. Law, C.-T. & Gold, J. I. Reinforcement learning can account for associative and perceptual  
1079 learning on a visual-decision task. *Nature Neuroscience* **12**, 655 (2009).
- 1080 34. Zoccolan, D., Oertelt, N., DiCarlo, J. J. & Cox, D. D. A rodent model for the study of  
1081 invariant visual object recognition. *Proceedings of the National Academy of Sciences* **106**,  
1082 8748–8753. ISSN: 1091-6490. <http://dx.doi.org/10.1073/pnas.0811583106> (May  
1083 2009).
- 1084 35. Brunton, B. W., Botvinick, M. M. & Brody, C. D. Rats and humans can optimally accu-  
1085 cumulate evidence for decision-making. *Science* **340**, 95–98 (2013).
- 1086 36. Usher, M. & McClelland, J. L. The time course of perceptual choice: the leaky, competing  
1087 accumulator model. *Psychological review* **108**, 550 (2001).
- 1088 37. Mazurek, M. E., Roitman, J. D., Ditterich, J. & Shadlen, M. N. A role for neural integrators  
1089 in perceptual decision making. *Cerebral Cortex* **13**, 1257–1269 (2003).
- 1090 38. Gold, J. I. & Shadlen, M. N. The neural basis of decision making. *Annual Review of*  
1091 *Neuroscience* **30** (2007).
- 1092 39. Heekeren, H. R., Marrett, S., Bandettini, P. A. & Ungerleider, L. G. A general mechanism  
1093 for perceptual decision-making in the human brain. *Nature* **431**, 859–862 (2004).
- 1094 40. Heekeren, H. R., Marrett, S. & Ungerleider, L. G. The neural systems that mediate human  
1095 perceptual decision making. *Nature Reviews Neuroscience* **9**, 467–479 (2008).
- 1096 41. Ma, W. J., Beck, J. M., Latham, P. E. & Pouget, A. Bayesian inference with probabilistic  
1097 population codes. *Nature Neuroscience* **9**, 1432–1438 (2006).
- 1098 42. Brown, S. D. & Heathcote, A. The simplest complete model of choice response time: Linear  
1099 ballistic accumulation. *Cognitive psychology* **57**, 153–178 (2008).
- 1100 43. Ratcliff, R. & McKoon, G. The diffusion decision model: theory and data for two-choice  
1101 decision tasks. *Neural Computation* **20**, 873–922 (2008).

- 1102 44. Beck, J. M. *et al.* Probabilistic population codes for Bayesian decision making. *Neuron* **60**,  
1103 1142–1152 (2008).
- 1104 45. Purcell, B. A. *et al.* Neurally constrained modeling of perceptual decision making. *Psycho-*  
1105 *logical Review* **117**, 1113 (2010).
- 1106 46. Bejjanki, V. R., Beck, J. M., Lu, Z.-L. & Pouget, A. Perceptual learning as improved  
1107 probabilistic inference in early sensory areas. *Nature Neuroscience* **14**, 642 (2011).
- 1108 47. Drugowitsch, J., Moreno-Bote, R., Churchland, A. K., Shadlen, M. N. & Pouget, A. The  
1109 cost of accumulating evidence in perceptual decision making. *Journal of Neuroscience* **32**,  
1110 3612–3628 (2012).
- 1111 48. Fard, P. R., Park, H., Warkentin, A., Kiebel, S. J. & Bitzer, S. A Bayesian reformulation  
1112 of the extended drift-diffusion model in perceptual decision making. *Frontiers in Compu-*  
1113 *tational Neuroscience* **11**, 29 (2017).
- 1114 49. Ratcliff, R., Thapar, A. & McKoon, G. Aging, practice, and perceptual tasks: A diffusion  
1115 model analysis. *Psychology and Aging* **21**, 353 (2006).
- 1116 50. Dutilh, G., Vandekerckhove, J., Tuerlinckx, F. & Wagenmakers, E.-J. A diffusion model  
1117 decomposition of the practice effect. *Psychonomic Bulletin & Review* **16**, 1026–1036 (2009).
- 1118 51. Petrov, A. A., Van Horn, N. M. & Ratcliff, R. Dissociable perceptual-learning mechanisms  
1119 revealed by diffusion-model analysis. *Psychonomic bulletin & review* **18**, 490–497 (2011).
- 1120 52. Liu, C. C. & Watanabe, T. Accounting for speed-accuracy tradeoff in perceptual learning.  
1121 *Vision Research* **61**, 107–114 (2012).
- 1122 53. Zhang, J. & Rowe, J. B. Dissociable mechanisms of speed-accuracy tradeoff during vi-  
1123 sual perceptual learning are revealed by a hierarchical drift-diffusion model. *Frontiers in*  
1124 *Neuroscience* **8**, 69 (2014).
- 1125 54. Notebaert, W. *et al.* Post-error slowing: An orienting account. *Cognition* **111**, 275–279  
1126 (2009).
- 1127 55. Dixon, M. L. & Christoff, K. The decision to engage cognitive control is driven by expected  
1128 reward-value: neural and behavioral evidence. *PloS one* **7** (2012).
- 1129 56. Shenhav, A., Botvinick, M. M. & Cohen, J. D. The expected value of control: an integrative  
1130 theory of anterior cingulate cortex function. *Neuron* **79**, 217–240 (2013).
- 1131 57. Cohen, J. D. in (ed Egner, T.) 1–28 (John Wiley & Sons, Ltd, Jan. 2017).
- 1132 58. Drugowitsch, J., Mendonça, A. G., Mainen, Z. F. & Pouget, A. Learning optimal deci-  
1133 sions with confidence. *Proceedings of the National Academy of Sciences* **116**, 24872–24880  
1134 (2019).
- 1135 59. Ditterich, J. Evidence for time-variant decision making. *European Journal of Neuroscience*  
1136 **24**, 3628–3641 (2006).
- 1137 60. Cisek, P., Puskas, G. A. & El-Murr, S. Decisions in changing conditions: the urgency-gating  
1138 model. *Journal of Neuroscience* **29**, 11560–11571 (2009).
- 1139 61. Hanks, T. D., Mazurek, M. E., Kiani, R., Hopp, E. & Shadlen, M. N. Elapsed decision  
1140 time affects the weighting of prior probability in a perceptual decision task. *Journal of*  
1141 *Neuroscience* **31**, 6339–6352 (2011).
- 1142 62. Deneve, S. Making decisions with unknown sensory reliability. *Frontiers in Neuroscience*  
1143 **6**, 75 (2012).
- 1144 63. Busse, L. *et al.* The detection of visual contrast in the behaving mouse. *Journal of Neuro-*  
1145 *science* **31**, 11351–11361 (2011).
- 1146 64. Scott, B. B., Constantinople, C. M., Erlich, J. C., Tank, D. W. & Brody, C. D. Sources  
1147 of noise during accumulation of evidence in unrestrained and voluntarily head-restrained  
1148 rats. *Elife* **4**, e11308 (2015).

- 1149 65. Akrami, A., Kopec, C. D., Diamond, M. E. & Brody, C. D. Posterior parietal cortex  
1150 represents sensory history and mediates its effects on behaviour. *Nature* **554**, 368–372  
1151 (2018).
- 1152 66. Odoemene, O., Pisupati, S., Nguyen, H. & Churchland, A. K. Visual evidence accumulation  
1153 guides decision-making in unrestrained mice. *Journal of Neuroscience* **38**, 10143–10155  
1154 (2018).
- 1155 67. Pinto, L. *et al.* An Accumulation-of-Evidence Task Using Visual Pulses for Mice Navigating  
1156 in Virtual Reality. *Frontiers in Behavioral Neuroscience* **12**. ISSN: 1662-5153. [http://dx.  
1157 doi.org/10.3389/fnbeh.2018.00036](http://dx.doi.org/10.3389/fnbeh.2018.00036) (Mar. 2018).
- 1158 68. Lak, A. *et al.* Dopaminergic and frontal signals for decisions guided by sensory evidence  
1159 and reward value. *bioRxiv*, 411413 (2018).
- 1160 69. Mendonça, A. G. *et al.* The impact of learning on perceptual decisions and its implication  
1161 for speed-accuracy tradeoffs. *bioRxiv*, 501858 (2018).
- 1162 70. Kepecs, A., Uchida, N., Zariwala, H. A. & Mainen, Z. F. Neural correlates, computation  
1163 and behavioural impact of decision confidence. *Nature* **455**, 227–231 (2008).
- 1164 71. Lak, A. *et al.* Orbitofrontal cortex is required for optimal waiting based on decision confi-  
1165 dence. *Neuron* **84**, 190–201 (2014).
- 1166 72. Krajbich, I. & Rangel, A. Multialternative drift-diffusion model predicts the relationship  
1167 between visual fixations and choice in value-based decisions. *Proceedings of the National  
1168 Academy of Sciences* **108**, 13852–13857 (2011).
- 1169 73. Tajima, S., Drugowitsch, J., Patel, N. & Pouget, A. Optimal policy for multi-alternative  
1170 decisions. *Nature Neuroscience* **22**, 1503–1511 (2019).
- 1171 74. Zoltowski, D. M., Latimer, K. W., Yates, J. L., Huk, A. C. & Pillow, J. W. Discrete  
1172 stepping and nonlinear ramping dynamics underlie spiking responses of LIP neurons during  
1173 decision-making. *Neuron* **102**, 1249–1258 (2019).
- 1174 75. Stine, G. M., Zylberberg, A., Ditterich, J. & Shadlen, M. N. Differentiating between inte-  
1175 gration and non-integration strategies in perceptual decision making. *eLife* **9** (eds Wyart,  
1176 V., Frank, M. J., Wyart, V. & Usher, M.) e55365. ISSN: 2050-084X. [https://doi.org/  
1177 10.7554/eLife.55365](https://doi.org/10.7554/eLife.55365) (Apr. 2020).
- 1178 76. Lillicrap, T. P., Cownden, D., Tweed, D. B. & Akerman, C. J. Random synaptic feedback  
1179 weights support error backpropagation for deep learning. *Nature Communications* **7**, 13276.  
1180 ISSN: 2041-1723. <http://dx.doi.org/10.1038/ncomms13276>  
1181 <http://www.nature.com/articles/ncomms13276> (Dec. 2016).
- 1182 77. Williams, R. J. Simple statistical gradient-following algorithms for connectionist reinforce-  
1183 ment learning. *Machine Learning* **8**, 229–256. ISSN: 0885-6125. [http://link.springer.  
1184 com/10.1007/BF00992696](http://link.springer.com/10.1007/BF00992696) (May 1992).
- 1185 78. Sutton, R. S. & Barto, A. G. *Reinforcement learning: An introduction* (MIT Press, 1992).
- 1186 79. Behrens, T. E., Woolrich, M. W., Walton, M. E. & Rushworth, M. F. Learning the value  
1187 of information in an uncertain world. *Nature Neuroscience* **10**, 1214–1221 (2007).
- 1188 80. Pineau, J., Ross, S. & Chaib-draa, B. *Bayes-Adaptive POMDPs: A New Perspective on  
1189 the Explore-Exploit Tradeoff in Partially Observable Domains*. in *ISAIM* (2008).
- 1190 81. Summerfield, C. & Tsetsos, K. Building Bridges between Perceptual and Economic Decision-  
1191 Making: Neural and Computational Mechanisms. *Frontiers in Neuroscience* **6**. ISSN: 1662-  
1192 4548. <http://dx.doi.org/10.3389/fnins.2012.00070> (2012).
- 1193 82. Botvinick, M., Wang, J. X., Dabney, W., Miller, K. J. & Kurth-Nelson, Z. Deep Reinforce-  
1194 ment Learning and Its Neuroscientific Implications. *Neuron* (2020).
- 1195 83. Leibo, J. Z. *et al.* Psychlab: A Psychology Laboratory for Deep Reinforcement Learning  
1196 Agents. *arXiv* (2018).



- 1197 84. Shenhav, A. *et al.* Toward a rational and mechanistic account of mental effort. *Annual*  
1198 *Review of Neuroscience* **40**, 99–124 (2017).
- 1199 85. Krebs, R. M., Boehler, C. N. & Woldorff, M. G. The influence of reward associations on  
1200 conflict processing in the Stroop task. *Cognition* **117**, 341–347 (2010).
- 1201 86. Padmala, S. & Pessoa, L. Reward reduces conflict by enhancing attentional control and  
1202 biasing visual cortical processing. *Journal of Cognitive Neuroscience* **23**, 3419–3432 (2011).
- 1203 87. Kool, W., McGuire, J. T., Rosen, Z. B. & Botvinick, M. M. Decision making and the  
1204 avoidance of cognitive demand. *Journal of Experimental Psychology: General* **139**, 665  
1205 (2010).
- 1206 88. Westbrook, A., Kester, D. & Braver, T. S. What is the subjective cost of cognitive effort?  
1207 Load, trait, and aging effects revealed by economic preference. *PloS One* **8** (2013).
- 1208 89. Kool, W. & Botvinick, M. Mental labour. *Nature Human Behaviour* **2**, 899–908 (2018).
- 1209 90. Westbrook, A., Lamichhane, B. & Braver, T. The subjective value of cognitive effort is  
1210 encoded by a domain-general valuation network. *Journal of Neuroscience* **39**, 3934–3947  
1211 (2019).
- 1212 91. Niyogi, R. K. *et al.* Optimal indolence: a normative microscopic approach to work and  
1213 leisure. *Journal of the Royal Society Interface* **11** (2013).
- 1214 92. Niyogi, R. K., Shizgal, P. & Dayan, P. Some Work and Some Play: Microscopic and Macro-  
1215 scopic Approaches to Labor and Leisure. *PLoS Computational Biology* **10** (ed Sporns, O.)  
1216 e1003894. ISSN: 1553-7358. <http://dx.doi.org/10.1371/journal.pcbi.1003894> (Dec.  
1217 2014).
- 1218 93. Sweis, B. M. *et al.* Sensitivity to “sunk costs” in mice, rats, and humans. *Science* **361**,  
1219 178–181 (2018).
- 1220 94. Wilson, R. C., Geana, A., White, J. M., Ludvig, E. A. & Cohen, J. D. Humans use directed  
1221 and random exploration to solve the explore–exploit dilemma. *Journal of Experimental*  
1222 *Psychology: General* **143**, 2074 (2014).
- 1223 95. Finn, C., Abbeel, P. & Levine, S. Model-agnostic meta-learning for fast adaptation of deep  
1224 networks. *International Conference on Machine Learning (ICML)*, 1126–1135 (2017).
- 1225 96. Wang, J. X. *et al.* Prefrontal cortex as a meta-reinforcement learning system. *Nature Neu-*  
1226 *roscience* **21**, 860–868. ISSN: 1097-6256. [http://dx.doi.org/10.1038/s41593-018-](http://dx.doi.org/10.1038/s41593-018-0147-8)  
1227 [0147-8](http://www.nature.com/articles/s41593-018-0147-8) <http://www.nature.com/articles/s41593-018-0147-8> (June 2018).
- 1228 97. Metcalfe, J. Metacognitive Judgments and Control of Study. *Current Directions in Psy-*  
1229 *chological Science* **18**, 159–163. ISSN: 0963-7214. [http://journals.sagepub.com/doi/](http://journals.sagepub.com/doi/10.1111/j.1467-8721.2009.01628.x)  
1230 [10.1111/j.1467-8721.2009.01628.x](http://journals.sagepub.com/doi/10.1111/j.1467-8721.2009.01628.x) (June 2009).
- 1231 98. Lieder, F., Shenhav, A., Musslick, S. & Griffiths, T. L. Rational metareasoning and the  
1232 plasticity of cognitive control. *PLoS computational biology* **14**, e1006043 (2018).
- 1233 99. Thorndike, E. L. in Chap. XI: Improvement in Informational, Appreciative, Analytic and  
1234 Selective Functions (NY: Teachers College, Columbia University, 1913).
- 1235 100. Newell, A. & Rosenbloom, P. S. in (ed Anderson, J. R.) chap. Mechanisms of Skill Acqui-  
1236 sition and the Law of Practice (Hillsdale, NJ: Erlbaum, 1981).
- 1237 101. Logan, G. D. Shapes of reaction-time distributions and shapes of learning curves: a test of  
1238 the instance theory of automaticity. *Journal of Experimental Psychology: Learning, Mem-*  
1239 *ory, and Cognition* **18**, 883 (1992).
- 1240 102. Heathcote, A., Brown, S. & Mewhort, D. The power law repealed: The case for an expo-  
1241 nential law of practice. *Psychonomic Bulletin & Review* **7**, 185–207 (2000).
- 1242 103. Posner, M. I. & Snyder, C. R. R. in (ed Solso, R. L.) chap. Attention and cognitive control  
1243 (Hillsdale, NJ: Erlbaum, 1975).

- 1244 104. Shiffrin, R. M. & Schneider, W. Shiffrin, Richard M., and Walter Schneider. "Controlled  
1245 and automatic human information processing: II. Perceptual learning, automatic attending  
1246 and a general theory. *Psychological Review* **84**, 127 (1977).
- 1247 105. Cohen, J. D., Dunbar, K. & McClelland, J. L. On the control of automatic processes: a  
1248 parallel distributed processing account of the Stroop effect. *Psychological Review* **97**, 332–  
1249 361 (1990).
- 1250 106. Cox, D. D. Do we understand high-level vision? *Current Opinion in Neurobiology* **25**, 187–  
1251 193 (2014).
- 1252 107. Wiecki, T. V., Sofer, I. & Frank, M. J. HDDM: hierarchical bayesian estimation of the  
1253 drift-diffusion model in python. *Frontiers in Neuroinformatics* **7**, 14 (2013).
- 1254 108. Ratcliff, R. Group Reaction Time Distributions and an Analysis of Distribution Statistics.  
1255 *Psychological Bulletin* **86**, 446–461 (1979).
- 1256 109. Blokland, A. Reaction Time Responding in Rats. *Neuroscience and Biobehavioral Reviews*  
1257 **22**, 847–864 (1998).
- 1258 110. Rouder, J. N. & Speckman, P. L. An evaluation of the Vincentizing method of form-  
1259 ing group-level response time distributions. *Psychonomic Bulletin & Review* **11**, 419–427  
1260 (2004).
- 1261 111. Whelan, R. Effective analysis of reaction time data. *The Psychological Record* **58**, 475–482  
1262 (2008).
- 1263 112. Vermaercke, B. *et al.* Functional specialization in rat occipital and temporal visual cortex.  
1264 *Journal of Neurophysiology* **112**, 1963–83 (Oct. 2014).

1265

## Supplementary Information

Table S1: Individual Animal Participation Across Behavioral Experiments

| Animal | Sex | Stimulus Pair 1             | Stimulus Pair 2 | Transparent Stimuli                                           | Stimulus Pair 3   |
|--------|-----|-----------------------------|-----------------|---------------------------------------------------------------|-------------------|
| AK1    | F   | size & rotation             |                 | alpha = 0                                                     |                   |
| AK2    | F   | size & rotation             |                 | alpha = 0.1                                                   |                   |
| AK3    | F   | size & rotation             |                 | alpha = 0.0                                                   |                   |
| AK4    | F   | size & rotation             |                 |                                                               |                   |
| AK5    | F   | size & rotation             |                 | alpha = 0.1 (excluded)‡                                       |                   |
| AK6    | F   | size & rotation             |                 | alpha = 0                                                     |                   |
| AK7    | F   | size & rotation             |                 | alpha = 0                                                     |                   |
| AK8    | F   | size & rotation (excluded)* |                 |                                                               |                   |
| AK9    | F   | size & rotation             |                 | alpha = 0.1                                                   |                   |
| AK10   | F   | size & rotation             |                 | alpha = 0.1                                                   |                   |
| AK11   | F   | size & rotation             |                 | alpha = 0.0                                                   |                   |
| AK12   | F   | size & rotation             |                 | alpha = 0.1 (excluded)‡                                       |                   |
| AL1    | F   | size & rotation             | canonical only  |                                                               | (excluded)§       |
| AL2    | F   | size & rotation             | canonical only  |                                                               | below             |
| AL3    | F   | size & rotation             | canonical only  |                                                               | above             |
| AL4    | F   | size & rotation             | canonical only  |                                                               | below (excluded)¶ |
| AL5    | F   | size & rotation             | canonical only  |                                                               | below             |
| AL6    | F   | size & rotation             | canonical only  |                                                               | below             |
| AL7    | F   | size & rotation             | canonical only  |                                                               | below (excluded)¶ |
| AL8    | F   | size & rotation             | canonical only  |                                                               | above             |
| AL9    | F   | size & rotation             |                 |                                                               |                   |
| AL10   | F   | size & rotation             |                 |                                                               |                   |
| AL11   | F   | size & rotation             |                 |                                                               |                   |
| AL12   | F   | size & rotation (excluded)* |                 |                                                               |                   |
| AL13   | F   | size & rotation             | canonical only  |                                                               | above             |
| AL14   | F   | size & rotation             | canonical only  |                                                               | below             |
| AL15   | F   | size & rotation             | canonical only  |                                                               | above             |
| AL16   | F   | size & rotation             | canonical only  |                                                               | above             |
| AM1    | F   | size & rotation†            | canonical only  |                                                               | below (excluded)  |
| AM2    | F   | size & rotation†            | canonical only  |                                                               | below             |
| AM3    | F   | size & rotation†            | canonical only  |                                                               | above             |
| AM4    | F   | size & rotation†            | canonical only  |                                                               | above             |
| AM5    | F   | size & rotation†            |                 |                                                               |                   |
| AM6    | F   | size & rotation†            |                 |                                                               |                   |
| AM7    | F   | size & rotation†            |                 |                                                               |                   |
| AM8    | F   | size & rotation†            |                 |                                                               |                   |
| AN1    | F   | canonical only              |                 |                                                               |                   |
| AN2    | F   | canonical only              |                 | <u>Exclusions</u>                                             |                   |
| AN3    | F   | canonical only              |                 | * failed to learn task.                                       |                   |
| AN4    | F   | canonical only              |                 | † not included in initial learning experiment.                |                   |
| AN5    | F   | canonical only              |                 | ‡ above chance for near-transparent stimuli.                  |                   |
| AN6    | F   | canonical only              |                 | § failed to learn previous stimuli.                           |                   |
| AN7    | F   | canonical only              |                 | ¶ not enough practice trials with reaction time restrictions. |                   |
| AN8    | F   | canonical only              |                 | failed to learn stimuli with reaction time restrictions.      |                   |

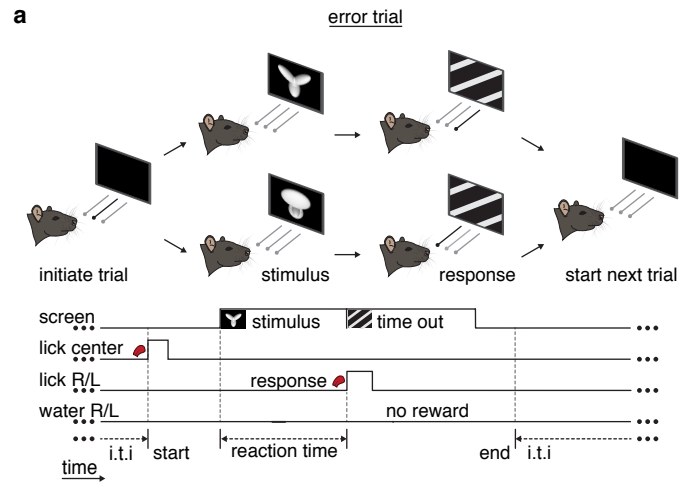

Figure S1: **Task schematic for error trials.** (a) Error trial: rat chooses incorrect left/right response port and incurs a timeout period.

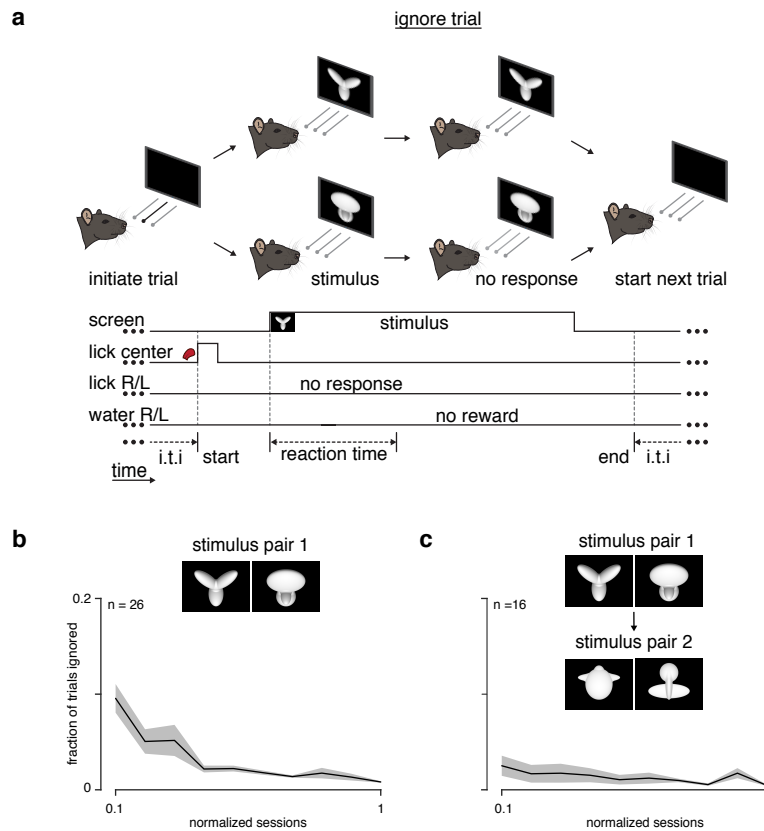

Figure S2: **Fraction of ignored trials during learning.** (a) Schematic of an ignore trial: rat does not choose a left/right response port and receives no feedback. (b) Fraction of trials ignored (ignored trials / (correct + incorrect + ignored trials)) during learning for animals encountering the task for the first time (stimulus pair 1). (c) Fraction of trials ignored for animals learning stimulus pair 2 after training on stimulus pair 1.

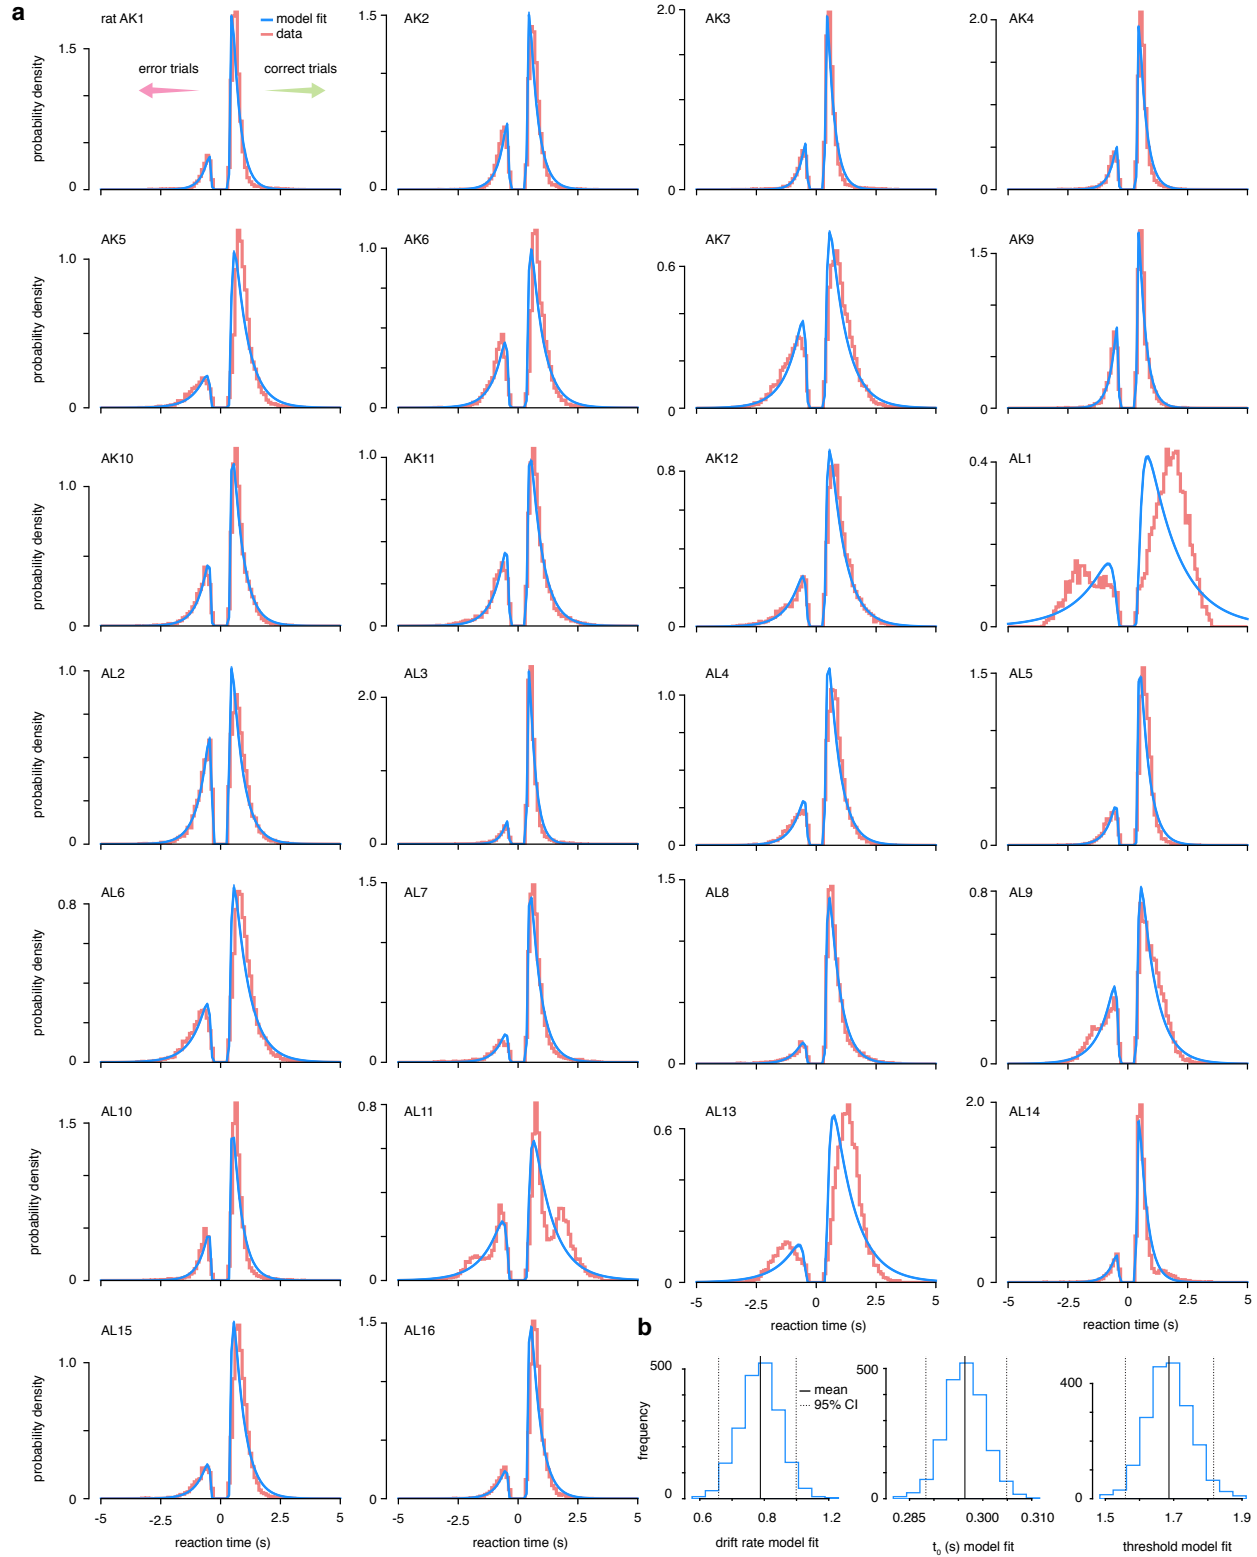

Figure S3: **Drift-diffusion model data fits.** (a) The accuracy and reaction time data from 26 trained rats was fit to a simple drift-diffusion model using the hierarchical Bayesian estimation of the drift-diffusion model (HDDM) package [107] (b) Estimated parameter value across all animals. The parameter estimates are distributions because of the Bayesian nature of the estimation method.

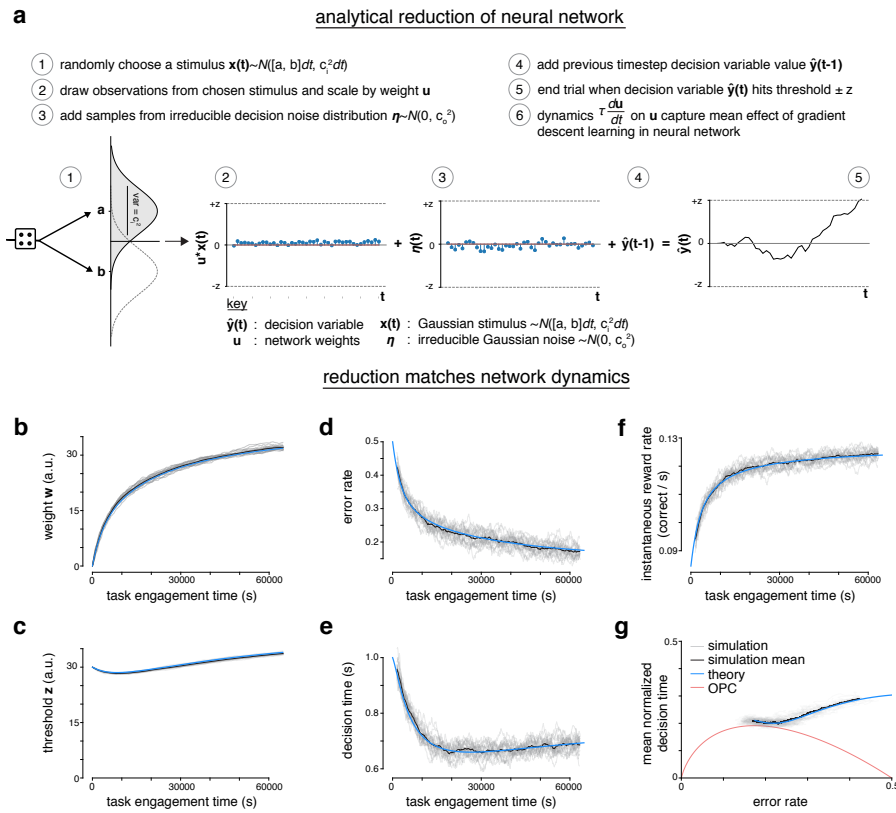

**Figure S4: Analytical reduction of LDDM matches error-corrective learning neural network dynamics during learning.** (a) The recurrent linear neural network can be analytically reduced. In the reduction, the decision variable draws an observation from one of two randomly chosen Gaussian “stimuli.” The observations are scaled by a perceptual weight. After the addition of some irreducible noise, the value of the decision variable at previous time step is added to the current time step. A trial ends once the decision variable hits a predetermined threshold. The dynamics of the perceptual weight capture the mean effect of gradient descent learning in the recurrent linear neural network. (b) Weight  $w$  of neural network across task engagement time for multiple simulations of the network (grey), the mean of the simulations (black) and the analytical reduction of the network (blue). (c) Same as in b but for the threshold  $z$ . (d) Same as in b but for the error rate (e) Same as in b but for the decision time (f) Same as in b but for the instantaneous reward rate (correct trials per second) (g) Learning trajectory in speed-accuracy space for simulations, simulation mean and analytical reduction (theory). OPC is shown in red.

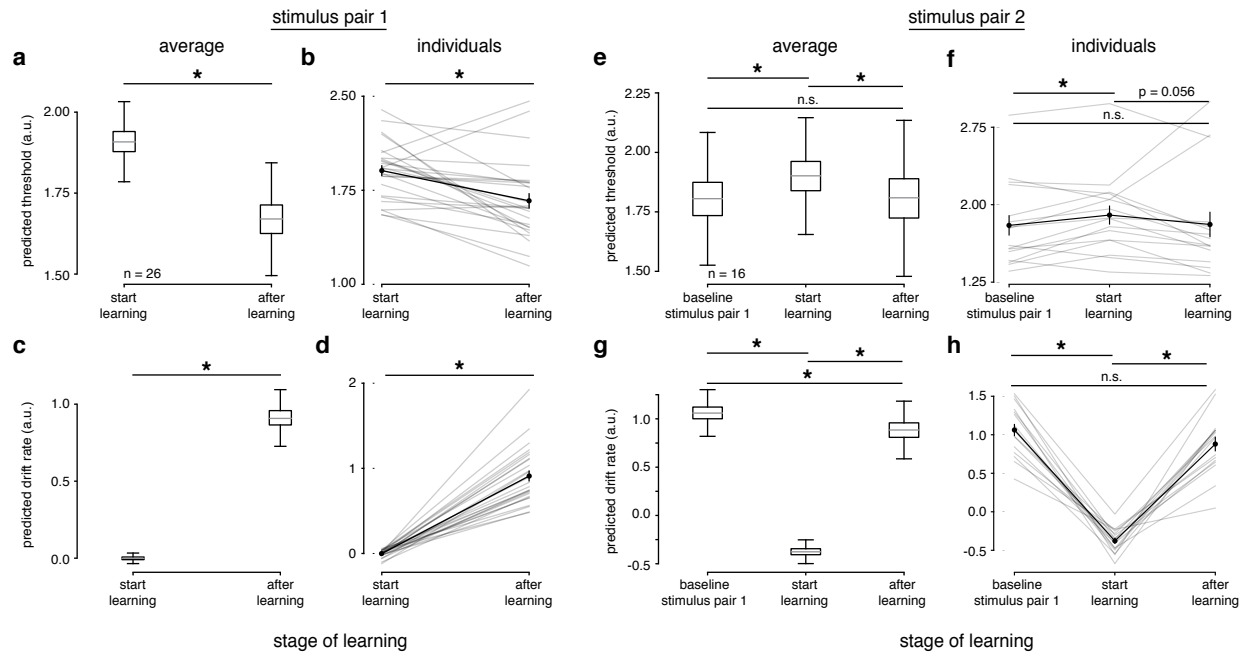

**Figure S5: Simple DDM fits indicate threshold decreases and drift rate increases during learning.** (a) The learning data from stimulus pair 1 and 2 were fit with a simple DDM using the HDDM framework [107]. The HDDM framework reports a distribution of possible parameter values for the population (a, c, e, g), as well as fits for individuals (b, d, f, h). (a) Predicted threshold values for average model across rats ( $n = 26$ ) for start of learning and after learning (first 1000 and last 1000 trials for each subject); 'start' and 'after' ( $p < 1e-4$ ). (b) Same as a but for individuals (grey and their mean and SEM (black)); 'start' and 'after' learning ( $p = 0.0006$ ). (c) Predicted drift rate values for average model across rats ( $n = 26$ ) for start of learning and after learning ( $p < 1e-4$ ). (d) Same as c but for individuals (grey) and their mean and SEM (black); 'start' and 'after' ( $p < 1e-4$ ). (e) Predicted threshold values for average model across rats ( $n = 16$ ) for baseline trials with stimulus pair 1, start of learning and after learning of stimulus pair 2 (last 500 trials with stimulus pair 1, first 500 and last 500 trials with stimulus pair 2 for each subject); baseline and 'start' ( $p = 0.0386$ ), 'start' and 'after' ( $p = 0.0557$ ), baseline and 'after' ( $p = 0.8767$ ). (f) Same as e but for individuals (grey) and their mean and SEM (black); baseline and 'start' ( $p < 1e-4$ ), 'start' and 'after' ( $p < 1e-4$ ), baseline and 'after' ( $p = 0.301601$ ). (g) Predicted drift rate values for average model across rats ( $n = 16$ ) for baseline, start of learning and after learning; baseline and 'start' ( $p < 1e-4$ ), 'start' and 'after' ( $p < 1e-4$ ), baseline and 'after' ( $p < 1e-4$ ). (h) Same as g but for individuals (grey) and their mean and SEM (black); baseline and 'start' ( $p = 0.0004$ ), 'start' and 'after' ( $p = 0.0004$ ), baseline and 'after' ( $p = 0.1089$ ). Wilcoxon signed-rank test for all tests, \* denotes  $p < 0.05$ , n.s. denotes 'not significant' ( $p > 0.05$ ).



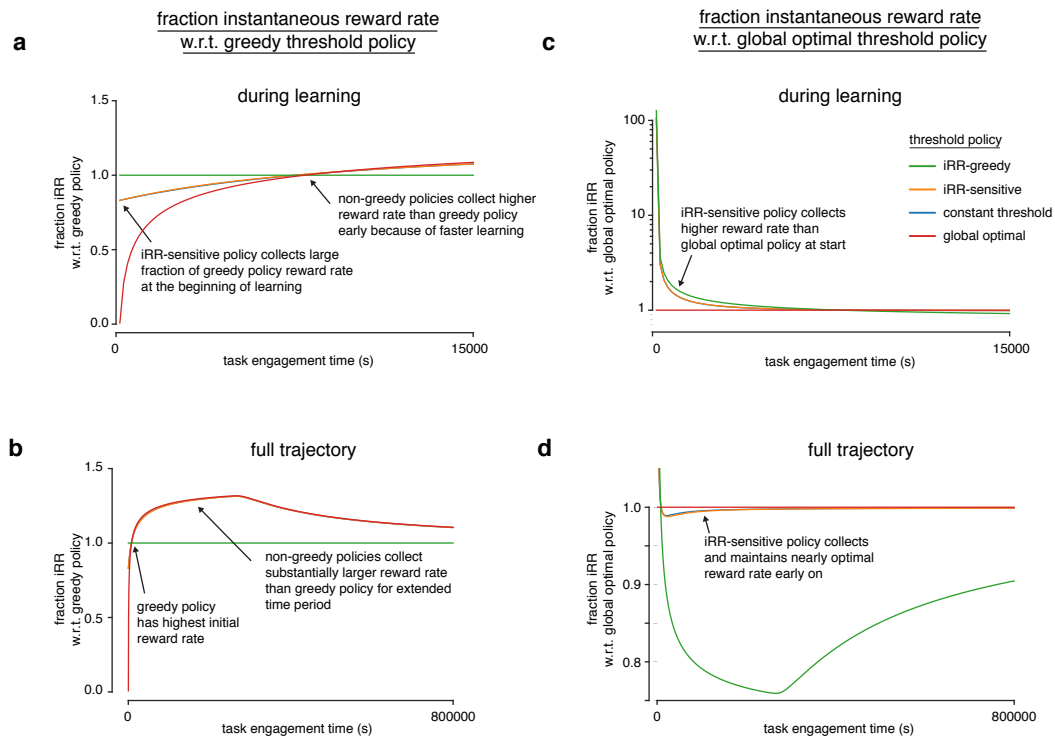

Figure S6: **Model reveals rat learning dynamics resemble optimal trajectory without relinquishing initial rewards.** (a) Fraction of instantaneous reward rate with respect to the iRR-greedy policy for all model threshold policies during learning. The instantaneous reward rates of all policies were normalized by the iRR-greedy policy's instantaneous reward rate through task engagement time. (b) Same as a but for the full trajectory of the simulation. (c) Fraction of instantaneous reward rate with respect to the global optimal policy for all model threshold policies during learning. The instantaneous reward rates of all policies were normalized by the greedy policy's instantaneous reward rate through task engagement time. (d) Same as c but for the full trajectory of the simulation.

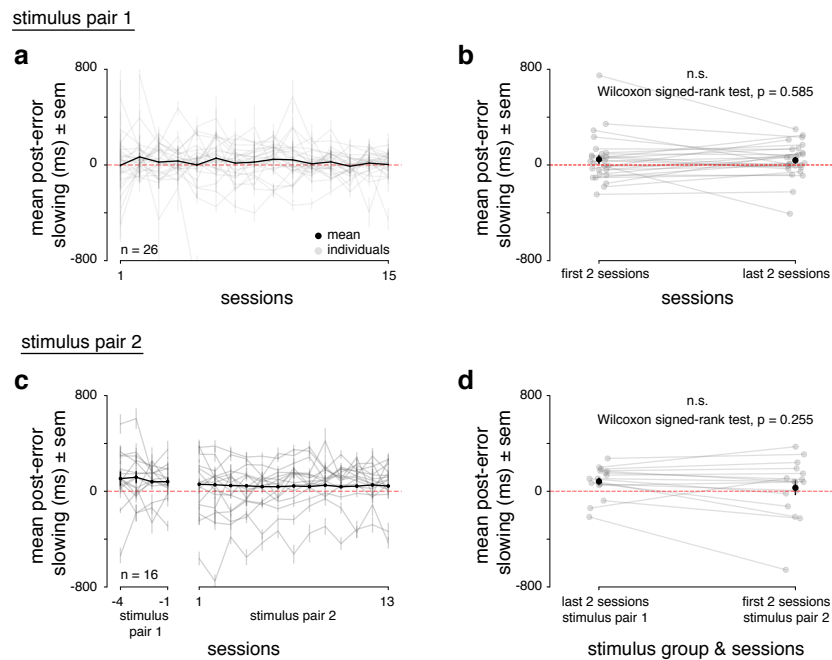

Figure S7: **Post-error slowing during rat learning dynamics.** (a) Individual (grey) and mean (black) post-error slowing across first 15 sessions for  $n = 26$  animals. Post-error slowing was calculated by taking the difference between RTs on trials with previous correct trials and previous error trials. A positive difference indicates post-error slowing. (b) Individual mean (grey) and population mean (black) post-error slowing for first 2 sessions of learning and last 2 sessions of learning for  $n = 26$  animals. A Wilcoxon signed-rank test found no significant difference in post-error slowing between the first 2 and last 2 sessions for every animal ( $p = 0.585$ ). (c) Same as in a for  $n = 16$  rats, with the addition of 4 baseline sessions with stimulus pair 1 plus the 13 sessions while subjects were learning stimulus pair 2. (d) Same as in b but comparing the last 2 baseline sessions with stimulus pair 1 and the first 2 sessions learning stimulus pair 2. A Wilcoxon signed-rank test found no significant difference in post-error slowing when the animals started learning stimulus pair 2 ( $p = 0.255$ ).

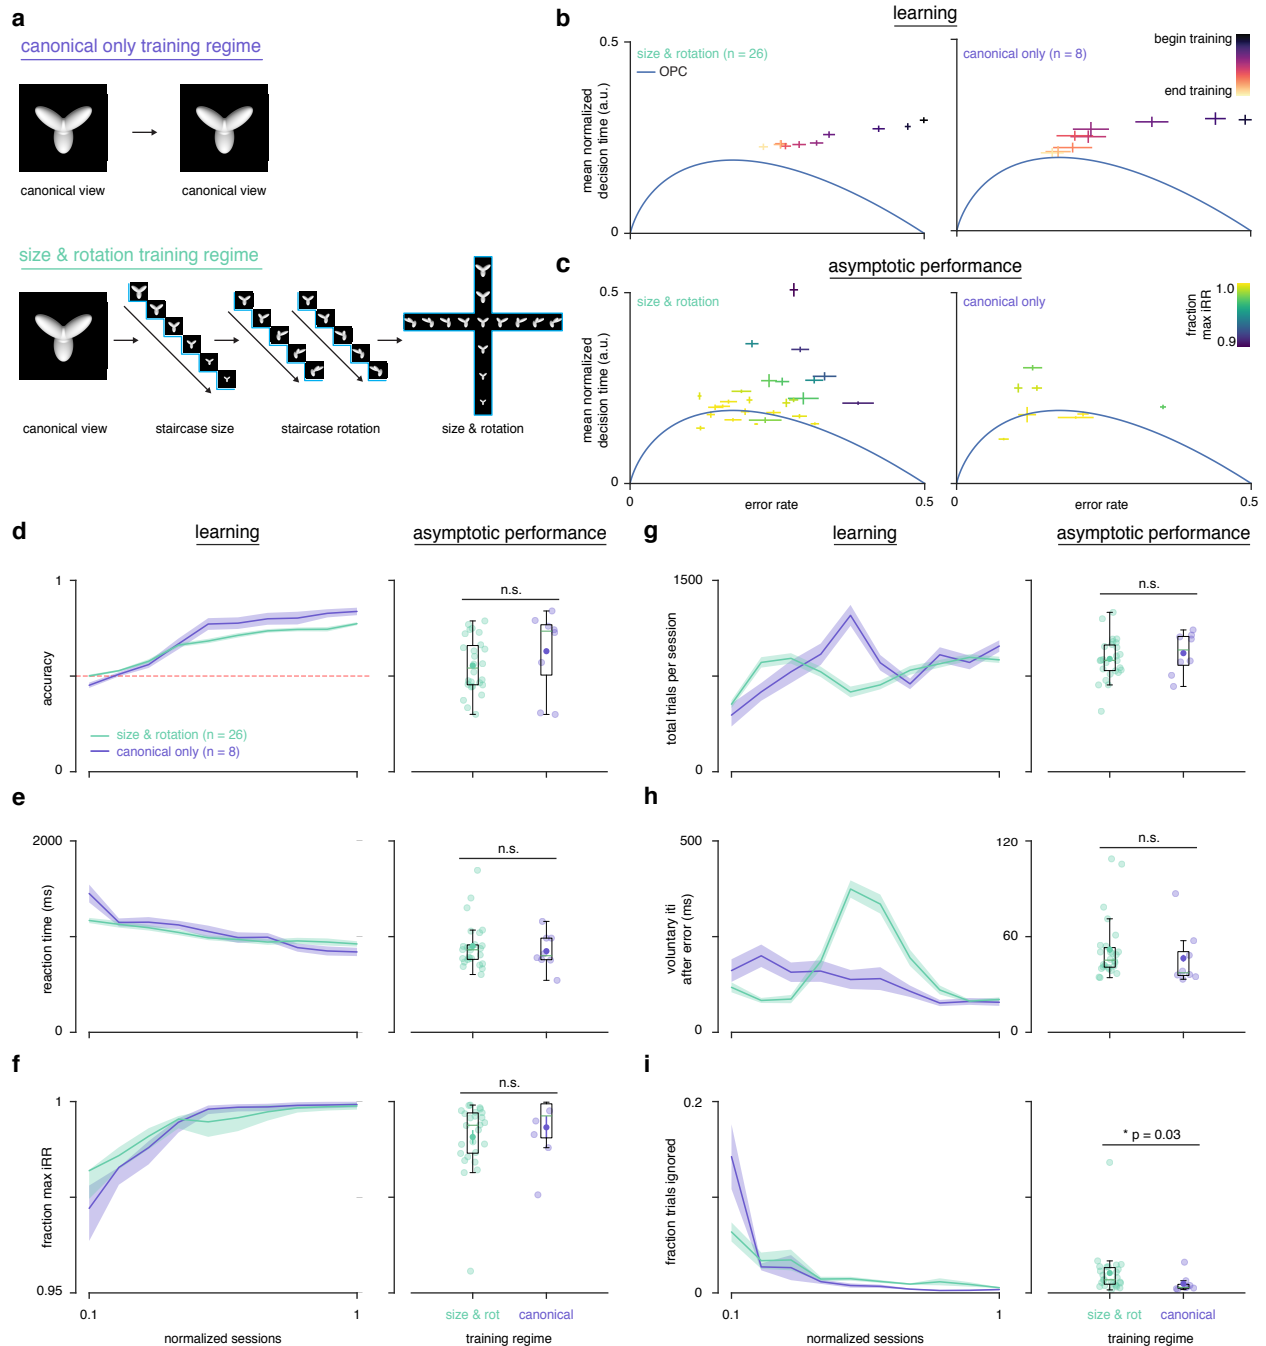

**Figure S8: Comparison of training regimes.** (a) ‘Canonical only’: rats trained to asymptotic performance with only front-view image of each of the two stimuli. ‘Size & rotation’: rats first shown front-view image of stimuli. After reaching criterion (accuracy = 0.7), size staircased. Following criterion, rotation staircased. Upon criterion, stimuli randomly drawn across size and rotation. (b) Learning trajectory in speed-accuracy space over normalized training time for rats trained with the ‘size & rotation’ (left panel) and the ‘canonical only’ training regimes (right panel). (c) Average location in speed-accuracy space for 10 sessions after asymptotic performance for individual rats in both training regimes, as in b. (d) Mean accuracy over learning (left panel) and for 5 sessions after asymptotic performance (right panel) for rats trained with the ‘size & rotation’ (n = 26) and the ‘canonical only’ (n = 8) training regimes. (e) Mean reaction time. (f) Mean fraction max iRR. (g) Mean total trials per session. (h) Mean voluntary intertrial interval up to 500 ms after error trials. (i) Mean fraction ignored trials. All errors are SEM. Significance in right panels of d-i determined by Wilcoxon rank-sum test with  $p < 0.05$ .

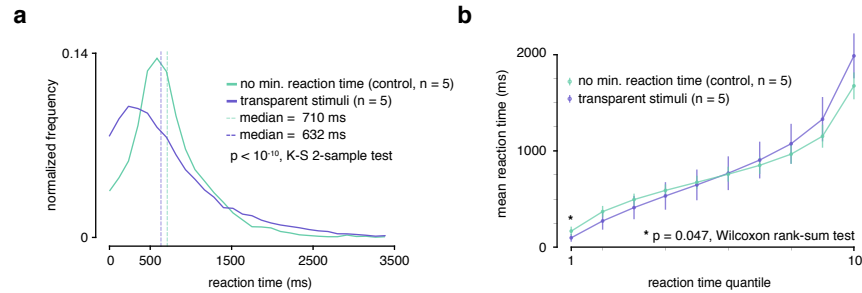

Figure S9: **Reaction time analysis of transparent stimuli experiment.** (a) During transparent stimuli, the reaction time (RT) minimum was relaxed to 0 ms to fully measure a possible shift in RT behavior. To be able to ascertain whether transparent stimuli led to a significant change in RT, the RT histogram of transparent stimuli (purple) sessions was compared to control sessions with visible stimuli (green) with no RT minimum. Medians indicated with dashed lines. Kolmogorov-Smirnov 2-sample test over distributions found significant difference ( $p < 10^{-10}$ ) (b) VincORIZED RTs for transparent and control visible stimuli sessions with no minimum reaction time. A Mann-Whitney U Test for the first quantile (fastest RTs) found a significant difference between the two groups ( $p = 0.047$ ).

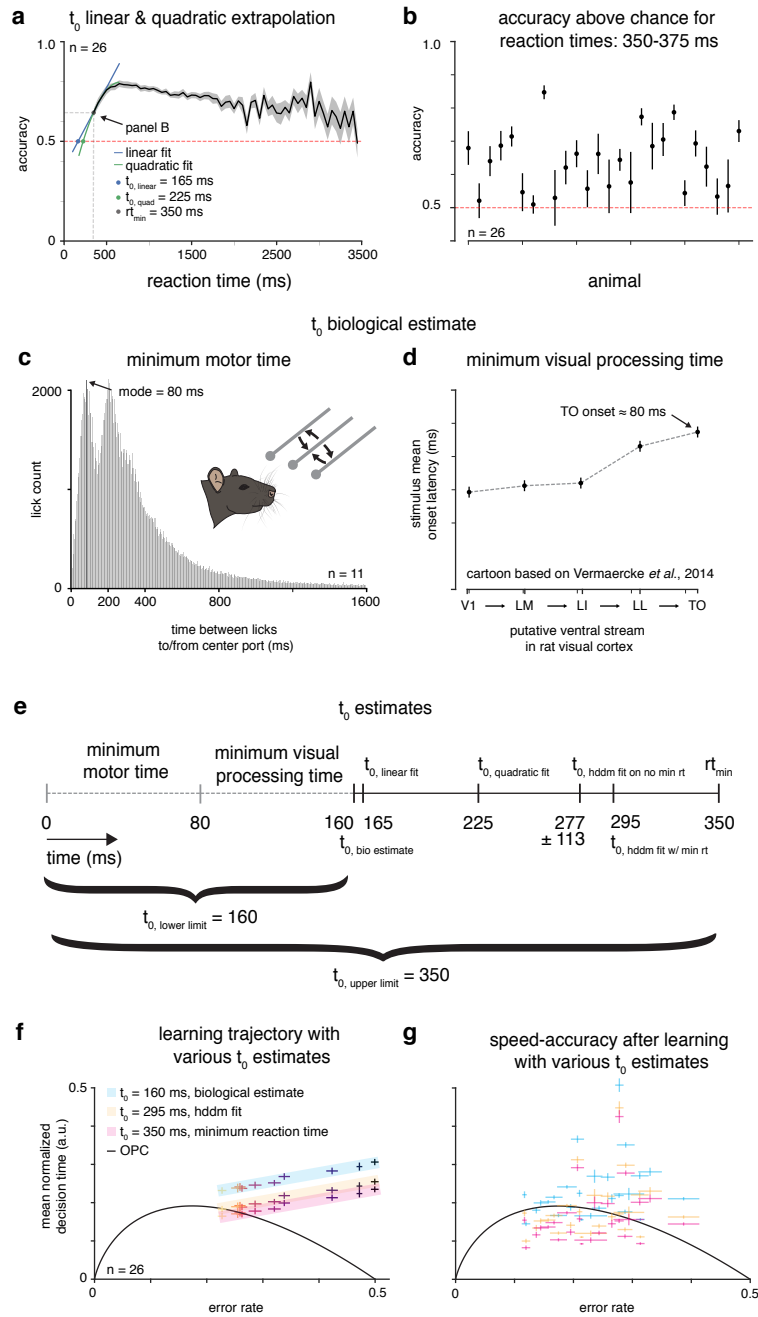

Figure S10: **Estimating  $T_0$ .** (a) Linear and quadratic extrapolations to accuracy as a function of reaction time. The  $t_0$  estimate is when each extrapolation intersects chance accuracy (0.5). (b) Mean accuracy for trials with reaction times 350-375 ms for  $n = 26$  rats. (c) Minimum motor time estimated by looking at first peak of time between licks to/from center port for  $n = 11$  rats. (d) Cartoon of stimulus onset latency across visual areas from Vermaercke *et al.*, 2014 [112] to estimate minimum visual processing time. (e) Diagram of  $t_0$  estimates, with an upper limit (minimum reaction time) and lower limit (minimum motor time + minimum visual processing time). (f) Mean learning trajectory for  $n = 26$  rats with various  $t_0$  estimates. (g) Subjects ( $n = 26$ ) in speed-accuracy space with various  $t_0$  estimates.

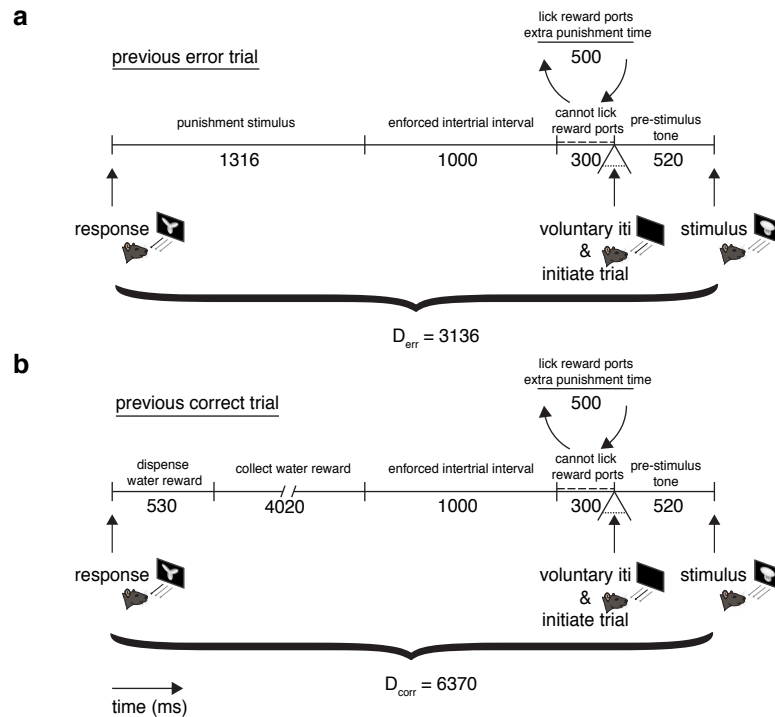

Figure S11: **Mandatory post-error ( $D_{err}$ ) and post-correct ( $D_{corr}$ ) response-to-stimulus interval times.** **(a)** Diagram of intertrial interval (ITI) after previous error trial. All times (punishment stimulus, enforced intertrial interval, cannot lick reward ports and pre-stimulus time) were verified based on timestamps on experimental file logs. After the punishment stimulus and enforced intertrial interval, there is a 300 ms period where rats cannot lick the reward ports. If violated, 500 ms are added to the intertrial interval followed by another 300 ms ‘cannot lick’ period. In addition to this restriction, rats may take as much voluntary time between trials as they wish. Any violation of the ‘cannot lick’ period is counted as voluntary time, and only the minimum mandatory time of 3136 ms is counted for  $D_{err}$ . **(b)** Diagram of ITI after previous correct trial. All times (dispense water reward, collect water reward, enforced intertrial interval, cannot lick reward ports, pre-stimulus time) was verified based on timestamps on experimental file logs. The same ‘cannot lick’ period is present as in **a**. All times (dispense water reward, collect water reward, enforced intertrial interval, cannot lick reward ports, pre-stimulus time) was verified based on timestamps on experimental file logs. Any violation of the ‘cannot lick’ period is counted as voluntary time, and only the minimum mandatory time of 6370 ms is counted for  $D_{corr}$ .

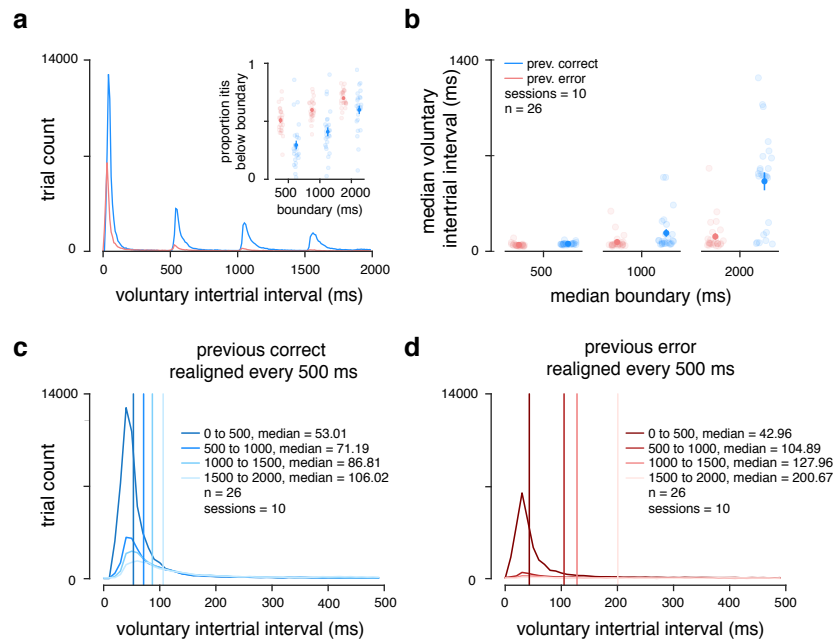

Figure S12: **Analysis of voluntary intertrial intervals.** (c) Histogram of voluntary ITIs (time in addition to mandatory experimentally determined  $D_{err}$  and  $D_{corr}$ ) for  $n = 26$  rats across 10 sessions for previous correct (blue) and previous error (red) ITIs. Voluntary ITIs are spaced every 500 ms because of violations to the ‘cannot lick’ period. *Inset*: proportion of voluntary ITIs below 500, 1000 and 2000 ms boundaries. (d) Median voluntary ITIs up too 500, 1000 and 2000 ms boundaries. (e) Overlay of voluntary ITIs spaced 500 ms apart after previous correct trials. (f) Overlay of voluntary ITIs spaced 500 ms apart after previous error trials.

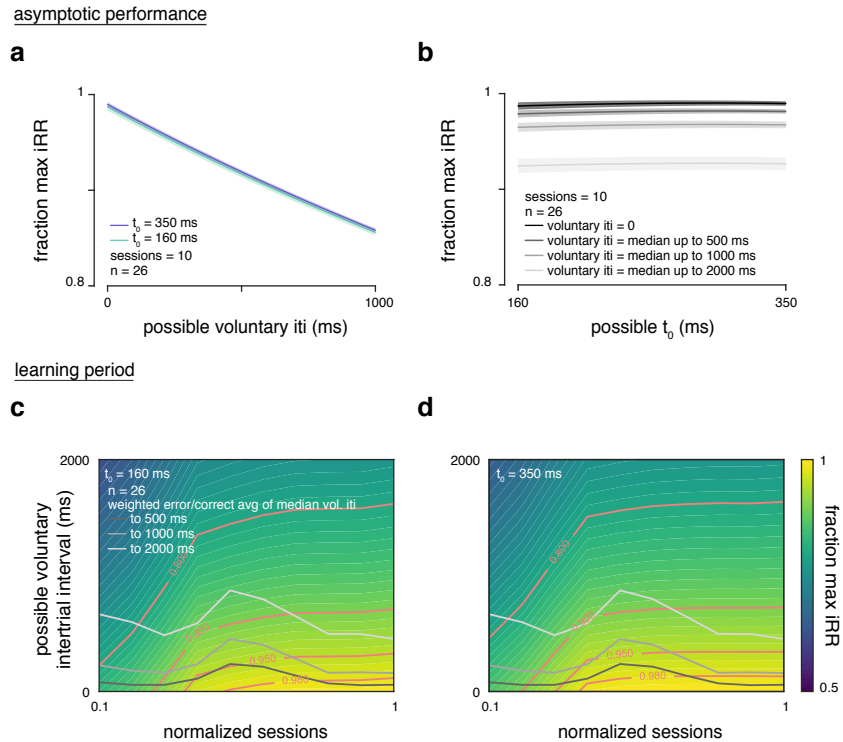

Figure S13: **Reward rate sensitivity to  $T_0$  and voluntary inter-trial interval.** (a) Fraction of maximum instantaneous reward rate across  $n = 26$  rats over 10 sessions at asymptotic performance over possible voluntary ITI values of 0 - 1000 ms and over the minimum and maximum estimated  $t_0$  values. (b) Fraction of maximum instantaneous reward rate across  $n = 26$  rats over 10 sessions at asymptotic performance over possible  $t_0$  values from 160 - 350 ms (min to max estimated  $t_0$  values) and over the median voluntary ITIs with 500, 1000 and 2000 ms boundaries. (c) Fraction of maximum instantaneous reward rate across  $n = 26$  rats as a function of normalized training time during learning period and possible voluntary ITIs from 0 to 2000 ms calculated with the  $t_0$  minimum of 160 ms. The grey curves represent a weighted average over previous correct/error median voluntary ITIs over normalized training time. Contours with different fractions of maximum instantaneous reward rate in pink. (d) Same as in c but calculated with  $t_0$  maximum of 350 ms.
